# Supplementary material for: Integrative -omics and HLA-ligandomics analysis to identify novel drug targets for ccRCC immunotherapy
Source: PubMed Central journal article supplement (PMC7106651; doi:10.1186/s13073-020-00731-8), 2020-03-30
Supplement: 13073_2020_731_MOESM2_ESM.pdf [file 13073_2020_731_MOESM2_ESM.pdf]

## **Additional file 2: Reustle et al.**

### **Supplementary Tables:**

- Tab. S2: HLA typing of patient cohort 1 and healthy donors for PBMC isolation.
- Tab. S3: Gene signatures for gene set enrichment analysis (GSEA).
- Tab. S4: Metabolites and metabolite classes included in the targeted metabolomics analysis of cohort 1.
- Tab. S5: Immuno-oncological marker proteins and associated biological processes.
- Tab. S6: Differentially methylated CpG sites in candidate gene regions.
- Tab. S7: Somatic mutations of candidate genes in the TCGA patient cohort.
- Tab. S8: Shared somatic variants in the TCGA patient cohort.
- Tab. S9: Coding variants in the candidate genes TSC2, RB1, and MET in patient cohort 1.
- Tab. S10: Overview of candidate genes.

### **Supplementary Figures:**

- Fig. S1: Peptide presentation and overall patient survival in patient cohort 1.
- Fig. S2: DNA methylation profiles of differentially methylated genes in the TCGA patient cohort.
- Fig. S3: Somatic variants in candidate genes in 392 samples of the TCGA patient cohort.
- Fig. S4: EGLN3-derived peptides and tumor immune infiltrate in patient cohort 1.
- Fig. S5: DNA methylation of the EGLN3 gene region.
- Fig. S6: Differentially regulated metabolites in EGLN3 knockdown 786-O cells.
- Fig. S7: Heatmap of gene expression of the 113 candidates in non-tumor and ccRCC tissue of the TCGA patient cohort.

**Tab. S2: HLA typing of patient cohort 1 and healthy donors for PBMC isolation.** The median numbers of class I and II HLA ligands detected in ccRCC and adjacent non-tumor tissues are also given in the table. In the case of healthy donors, tested HLA alleles are underlined.

|                                                                       | HLA class I     |                 | HLA class II               |                 |
|-----------------------------------------------------------------------|-----------------|-----------------|----------------------------|-----------------|
| ccRCC: median nr. of peptides per patient (range)                     | 1457 (121-4934) |                 | 636 (0-4924)               |                 |
| Adjacent non-tumor tissue: median nr. of peptides per patient (range) | 768 (40-2287)   |                 | 442 (0-2055)               |                 |
|                                                                       | Allele          | Nr. of patients | Allele                     | Nr. of patients |
| Cohort 1 (n=55)                                                       | A*01            | 16              | Not available <sup>a</sup> | 3               |
|                                                                       | A*02            | 22              | DPB1*02                    | 3               |
|                                                                       | A*03            | 12              | DPB1*03                    | 4               |
|                                                                       | A*11            | 9               | DPB1*04                    | 9               |
|                                                                       | A*23            | 1               | DPB1*06                    | 1               |
|                                                                       | A*24            | 11              | DPB1*09                    | 1               |
|                                                                       | A*25            | 1               | DPB1*11                    | 1               |
|                                                                       | A*26            | 4               | DPB1*13                    | 1               |
|                                                                       | A*29            | 4               | DPB1*14                    | 1               |
|                                                                       | A*30            | 3               | DQA1*01                    | 31              |
|                                                                       | A*31            | 4               | DQA1*02                    | 12              |
|                                                                       | A*32            | 2               | DQA1*03                    | 5               |
|                                                                       | A*33            | 1               | DQA1*04                    | 2               |
|                                                                       | A*66            | 1               | DQA1*05                    | 19              |
|                                                                       | A*68            | 6               | DQB1*02                    | 21              |
|                                                                       | B*07            | 11              | DQB1*03                    | 28              |
|                                                                       | B*08            | 10              | DQB1*04                    | 3               |
|                                                                       | B*13            | 3               | DQB1*05                    | 19              |
|                                                                       | B*14            | 2               | DQB1*06                    | 23              |
|                                                                       | B*15            | 7               | DRB1*01                    | 12              |
|                                                                       | B*18            | 5               | DRB1*03                    | 11              |
|                                                                       | B*27            | 6               | DRB1*04                    | 9               |
|                                                                       | B*35            | 11              | DRB1*07                    | 15              |
|                                                                       | B*37            | 2               | DRB1*08                    | 3               |
|                                                                       | B*38            | 3               | DRB1*09                    | 1               |
|                                                                       | B*39            | 2               | DRB1*11                    | 14              |
|                                                                       | B*40            | 6               | DRB1*12                    | 1               |
|                                                                       | B*41            | 1               | DRB1*13                    | 17              |
|                                                                       | B*44            | 14              | DRB1*14                    | 5               |
|                                                                       | B*49            | 1               | DRB1*15                    | 8               |
|                                                                       | B*50            | 2               | DRB1*16                    | 4               |
|                                                                       | B*51            | 9               | DRB3                       | 1               |
| B*52                                                                  | 2               | DRB3*01         | 4                          |                 |
| B*53                                                                  | 3               | DRB3*02         | 7                          |                 |
| B*55                                                                  | 2               | DRB3*03         | 4                          |                 |

|                      |             |    |         |   |
|----------------------|-------------|----|---------|---|
|                      | B*57        | 2  | DRB4    | 2 |
|                      | B*58        | 2  | DRB4*01 | 4 |
|                      | C*01        | 3  |         |   |
|                      | C*02        | 11 |         |   |
|                      | C*03        | 10 |         |   |
|                      | C*04        | 11 |         |   |
|                      | C*05        | 6  |         |   |
|                      | C*06        | 7  |         |   |
|                      | C*07        | 28 |         |   |
|                      | C*08        | 2  |         |   |
|                      | C*12        | 6  |         |   |
|                      | C*14        | 1  |         |   |
|                      | C*15        | 5  |         |   |
|                      | C*16        | 4  |         |   |
|                      | C*17        | 1  |         |   |
| Healthy donors (n=6) | A*01        | 3  |         |   |
|                      | <u>A*02</u> | 5  |         |   |
|                      | A*03        | 2  |         |   |
|                      | A*29        | 1  |         |   |
|                      | <u>B*07</u> | 1  |         |   |
|                      | <u>B*08</u> | 2  |         |   |
|                      | <u>B*15</u> | 2  |         |   |
|                      | B*35        | 1  |         |   |
|                      | <u>B*40</u> | 1  |         |   |
|                      | B*41        | 1  |         |   |
|                      | B*44        | 2  |         |   |
|                      | B*51        | 2  |         |   |

<sup>a</sup> HLA class II alleles could not be determined

**Tab. S3: Gene signatures for gene set enrichment analysis (GSEA).** Shown are only those that were enriched in at least one of the cohorts.

| Signature                          | Collection             | Source | Description (MSigDB)                                                                                                                               | Enriched in cohort | In final set |
|------------------------------------|------------------------|--------|----------------------------------------------------------------------------------------------------------------------------------------------------|--------------------|--------------|
| BCAT_BILD_ET_AL_UP                 | C6 Oncogenic gene sets | MSigDB | Genes up-regulated in primary epithelial breast cancer cell culture over-expressing activated CTNNB1 [GeneID=1499] gene.                           | TCGA               | no           |
| CAMP_UP.V1_DN                      | C6 Oncogenic gene sets | MSigDB | Genes down-regulated in primary thyrocyte cultures in response to cAMP signaling pathway activation by thyrotropin (TSH).                          | TCGA               | no           |
| CAMP_UP.V1_UP                      | C6 Oncogenic gene sets | MSigDB | Genes up-regulated in primary thyrocyte cultures in response to cAMP signaling pathway activation by thyrotropin (TSH).                            | cohort 1, TCGA     | yes          |
| CORDENONSI_YAP_CONSERVED_SIGNATURE | C6 Oncogenic gene sets | MSigDB | YAP conserved signature.                                                                                                                           | cohort 1, TCGA     | yes          |
| CSR_EARLY_UP.V1_UP                 | C6 Oncogenic gene sets | MSigDB | Genes up-regulated in early serum response of CRL 2091 cells (foreskin fibroblasts).                                                               | TCGA               | no           |
| E2F1_UP.V1_DN                      | C6 Oncogenic gene sets | MSigDB | Genes down-regulated in mouse fibroblasts over-expressing E2F1 [GeneID=1869] gene.                                                                 | TCGA               | no           |
| EGFR_UP.V1_UP                      | C6 Oncogenic gene sets | MSigDB | Genes up-regulated in MCF-7 cells (breast cancer) positive for ESR1 [GeneID=2099] and engineered to express ligand-activatable EGFR [GeneID=1956]. | TCGA               | no           |
| EIF4E_DN                           | C6 Oncogenic gene sets | MSigDB | Genes down-regulated in HMEC cells (primary mammary epithelium) upon over-expression of EIF4E [GeneID=1977] gene.                                  | TCGA               | no           |
| GLI1_UP.V1_UP                      | C6 Oncogenic gene sets | MSigDB | Genes up-regulated in RK3E cells (kidney epithelium) over-expressing GLI1 [GeneID=2735].                                                           | TCGA               | no           |
| HINATA_NFKB_MATRIX                 | C6 Oncogenic gene sets | MSigDB | Matrix, adhesion or cytoskeleton genes induced by NF-kappaB in primary keratinocytes and fibroblasts.                                              | cohort 1, TCGA     | yes          |
| HOXA9_DN.V1_UP                     | C6 Oncogenic gene sets | MSigDB | Genes up-regulated in MOLM-14 cells (AML) with knockdown of HOXA9 [GeneID=3205] gene by RNAi vs controls.                                          | TCGA               | no           |
| RB_DN.V1_DN                        | C6 Oncogenic gene sets | MSigDB | Genes down-regulated in primary keratinocytes from RB1 [GeneID=5925] skin specific knockout mice.                                                  | TCGA               | no           |
| RB_P107_DN.V1_DN                   | C6 Oncogenic gene sets | MSigDB | Genes down-regulated in primary keratinocytes from RB1 and RBL1 [GeneID=5925][GeneID=5933] skin specific knockout mice.                            | TCGA               | no           |
| RB_P130_DN.V1_DN                   | C6 Oncogenic gene sets | MSigDB | Genes down-regulated in primary keratinocytes from RB1 and RBL2 [GeneID=5925][GeneID=5934] skin specific knockout mice.                            | cohort 1, TCGA     | yes          |
| SIRNA EIF4GI_UP                    | C6 Oncogenic gene sets | MSigDB | Genes up-regulated in MCF10A cells vs knockdown of EIF4G1 [GeneID=1981] gene by RNAi.                                                              | cohort 1, TCGA     | yes          |

|                                                |                        |        |                                                                                                                                                                                   |                |     |
|------------------------------------------------|------------------------|--------|-----------------------------------------------------------------------------------------------------------------------------------------------------------------------------------|----------------|-----|
| TBK1.DF_DN                                     | C6 Oncogenic gene sets | MSigDB | Genes down-regulated in epithelial lung cancer cell lines upon over-expression of an oncogenic form of KRAS [GeneID=3845] gene and knockdown of TBK1 [GeneID=29110] gene by RNAi. | TCGA           | no  |
| TBK1.DF_UP                                     | C6 Oncogenic gene sets | MSigDB | Genes down-regulated in epithelial lung cancer cell lines upon over-expression of an oncogenic form of KRAS [GeneID=3845] gene and knockdown of TBK1 [GeneID=29110] gene by RNAi. | TCGA           | no  |
| TBK1.DN.48HRS_DN                               | C6 Oncogenic gene sets | MSigDB | Genes up-regulated in epithelial lung cancer cell lines upon over-expression of an oncogenic form of KRAS [GeneID=3845] gene and knockdown of TBK1 [GeneID=29110] gene by RNAi.   | TCGA           | no  |
| TBK1.DN.48HRS_UP                               | C6 Oncogenic gene sets | MSigDB | Genes up-regulated in epithelial lung cancer cell lines upon over-expression of an oncogenic form of KRAS [GeneID=3845] gene and knockdown of TBK1 [GeneID=29110] gene by RNAi.   | TCGA           | no  |
| YAP1_UP                                        | C6 Oncogenic gene sets | MSigDB | Genes up-regulated in MCF10A cells (breast cancer) over-expressing YAP1 [GeneID=10413] gene.                                                                                      | TCGA           | no  |
| HALLMARK_ADIPOGENESIS                          | H Hallmark gene sets   | MSigDB | Genes up-regulated during adipocyte differentiation (adipogenesis).                                                                                                               | cohort 1, TCGA | yes |
| HALLMARK_ANDROGEN_RESP<br>ONSE                 | H Hallmark gene sets   | MSigDB | Genes defining response to androgens.                                                                                                                                             | cohort 1, TCGA | yes |
| HALLMARK_ANGIOGENESIS                          | H Hallmark gene sets   | MSigDB | Genes up-regulated during formation of blood vessels (angiogenesis).                                                                                                              | cohort 1, TCGA | yes |
| HALLMARK_APOPTOSIS                             | H Hallmark gene sets   | MSigDB | Genes mediating programmed cell death (apoptosis) by activation of caspases.                                                                                                      | cohort 1, TCGA | yes |
| HALLMARK_CHOLESTEROL_HO<br>MEOSTASIS           | H Hallmark gene sets   | MSigDB | Genes involved in cholesterol homeostasis.                                                                                                                                        | cohort 1, TCGA | yes |
| HALLMARK_COMPLEMENT                            | H Hallmark gene sets   | MSigDB | Genes encoding components of the complement system, which is part of the innate immune system.                                                                                    | TCGA           | no  |
| HALLMARK_DNA_REPAIR                            | H Hallmark gene sets   | MSigDB | Genes involved in DNA repair.                                                                                                                                                     | TCGA           | no  |
| HALLMARK_EPITHELIAL_MESE<br>NCHYMAL_TRANSITION | H Hallmark gene sets   | MSigDB | Genes defining epithelial-mesenchymal transition, as in wound healing, fibrosis and metastasis.                                                                                   | cohort 1, TCGA | yes |
| HALLMARK_FATTY_ACID_MET<br>ABOLISM             | H Hallmark gene sets   | MSigDB | Genes encoding proteins involved in metabolism of fatty acids.                                                                                                                    | TCGA           | no  |
| HALLMARK_GLYCOLYSIS                            | H Hallmark gene sets   | MSigDB | Genes encoding proteins involved in glycolysis and gluconeogenesis.                                                                                                               | cohort 1, TCGA | yes |
| HALLMARK_HYPOXIA                               | H Hallmark gene sets   | MSigDB | Genes up-regulated in response to low oxygen levels (hypoxia).                                                                                                                    | cohort 1, TCGA | yes |
| HALLMARK_IL2_STAT5_SIGNAL                      | H Hallmark gene sets   | MSigDB | Genes up-regulated by STAT5 in response to IL2 stimulation.                                                                                                                       | TCGA           | no  |

|                                          |                      |        |                                                                                                                       |                         |     |
|------------------------------------------|----------------------|--------|-----------------------------------------------------------------------------------------------------------------------|-------------------------|-----|
| ING                                      |                      |        |                                                                                                                       |                         |     |
| HALLMARK_INTERFERON_ALPHA_RESPONSE       | H Hallmark gene sets | MSigDB | Genes up-regulated in response to alpha interferon proteins.                                                          | cohort 1, TCGA          | yes |
| HALLMARK_INTERFERON_GAMMA_RESPONSE       | H Hallmark gene sets | MSigDB | Genes up-regulated in response to IFNG [GeneID=3458].                                                                 | cohort 1, TCGA          | yes |
| HALLMARK_MITOTIC_SPINDLE                 | H Hallmark gene sets | MSigDB | Genes important for mitotic spindle assembly.                                                                         | cohort 1                | no  |
| HALLMARK_MTORC1_SIGNALING                | H Hallmark gene sets | MSigDB | Genes up-regulated through activation of mTORC1 complex.                                                              | cohort 1, TCGA          | yes |
| HALLMARK_MYC_TARGETS_V1                  | H Hallmark gene sets | MSigDB | A subgroup of genes regulated by MYC - version 1 (v1).                                                                | cohort 1, TCGA          | yes |
| HALLMARK_MYC_TARGETS_V2                  | H Hallmark gene sets | MSigDB | A subgroup of genes regulated by MYC - version 2 (v2).                                                                | TCGA                    | no  |
| HALLMARK_NOTCH_SIGNALING                 | H Hallmark gene sets | MSigDB | Genes up-regulated by activation of Notch signaling.                                                                  | cohort 1, TCGA          | yes |
| HALLMARK_OXIDATIVE_PHOSPHORYLATION       | H Hallmark gene sets | MSigDB | Genes encoding proteins involved in oxidative phosphorylation.                                                        | cohort 1, ProxTub, TCGA | no  |
| HALLMARK_P53_PATHWAY                     | H Hallmark gene sets | MSigDB | Genes involved in p53 pathways and networks.                                                                          | cohort 1, TCGA          | yes |
| HALLMARK_PEROXISOME                      | H Hallmark gene sets | MSigDB | Genes encoding components of peroxisome.                                                                              | TCGA                    | no  |
| HALLMARK_PI3K_AKT_MTOR_SIGNALING         | H Hallmark gene sets | MSigDB | Genes up-regulated by activation of the PI3K/AKT/mTOR pathway.                                                        | cohort 1, TCGA          | yes |
| HALLMARK_PROTEIN_SECRETION               | H Hallmark gene sets | MSigDB | Genes involved in protein secretion pathway.                                                                          | cohort 1, TCGA          | yes |
| HALLMARK_REACTIVE_OXYGEN_SPECIES_PATHWAY | H Hallmark gene sets | MSigDB | Genes up-regulated by reactive oxygen species (ROS).                                                                  | cohort 1, ProxTub, TCGA | no  |
| HALLMARK_TGF_BETA_SIGNALING              | H Hallmark gene sets | MSigDB | Genes up-regulated in response to TGFB1 [GeneID=7040].                                                                | cohort 1, TCGA          | yes |
| HALLMARK_TNFA_SIGNALING_VIA_NFKB         | H Hallmark gene sets | MSigDB | Genes regulated by NF-kB in response to TNF [GeneID=7124].                                                            | cohort 1, TCGA          | yes |
| HALLMARK_UNFOLDED_PROTEIN_RESPONSE       | H Hallmark gene sets | MSigDB | Genes up-regulated during unfolded protein response, a cellular stress response related to the endoplasmic reticulum. | cohort 1, TCGA          | yes |
| HALLMARK_UV_RESPONSE_DN                  | H Hallmark gene sets | MSigDB | Genes down-regulated in response to ultraviolet (UV) radiation.                                                       | cohort 1, TCGA          | yes |
| HALLMARK_UV_RESPONSE_UP                  | H Hallmark gene sets | MSigDB | Genes up-regulated in response to ultraviolet (UV) radiation.                                                         | TCGA                    | no  |
| BIOCARTA_CDC42RAC_PATHWAY                | C2 Biocarta          | MSigDB | Role of PI3K subunit p85 in regulation of Actin Organization and Cell Migration                                       | TCGA                    | no  |
| BIOCARTA_EIF_PATHWAY                     | C2 Biocarta          | MSigDB | Eukaryotic protein translation                                                                                        | TCGA                    | no  |
| BIOCARTA_ETC_PATHWAY                     | C2 Biocarta          | MSigDB | Electron Transport Reaction in Mitochondria                                                                           | TCGA                    | no  |
| BIOCARTA_GLYCOLYSIS_PATHWAY              | C2 Biocarta          | MSigDB | Glycolysis Pathway                                                                                                    | TCGA                    | no  |
| BIOCARTA_KREB_PATHWAY                    | C2 Biocarta          | MSigDB | The Citric Acid Cycle                                                                                                 | TCGA                    | no  |
| BIOCARTA_PROTEASOME_PATHWAY              | C2 Biocarta          | MSigDB | Proteasome Complex                                                                                                    | TCGA                    | no  |

|                                                                                                                |                            |        |                                                                                                                          |                |     |
|----------------------------------------------------------------------------------------------------------------|----------------------------|--------|--------------------------------------------------------------------------------------------------------------------------|----------------|-----|
| BIOCARTA_SALMONELLA_PATHWAY                                                                                    | C2 Biocarta                | MSigDB | How does salmonella hijack a cell                                                                                        | cohort 1, TCGA | yes |
| BIOCARTA_VDR_PATHWAY                                                                                           | C2 Biocarta                | MSigDB | Control of Gene Expression by Vitamin D Receptor                                                                         | cohort 1       | no  |
| REACTOME_3_UTR_MEDIATED_TRANSLATIONAL_REGULATION                                                               | C2 Reactome                | MSigDB | Genes involved in 3' -UTR-mediated translational regulation                                                              | TCGA           | no  |
| REACTOME_ACTIVATION_OF_THE_MRNA_UPON_BINDING_OF_THE_CAP_BINDING_COMPLEX_AND_EIF5_AND_SUBSEQUENT_BINDING_TO_43S | C2 Reactome                | MSigDB | Genes involved in Activation of the mRNA upon binding of the cap-binding complex and eIFs, and subsequent binding to 43S | TCGA           | no  |
| REACTOME_COPI_MEDIATED_TRANSPORT                                                                               | C2 Reactome                | MSigDB | Genes involved in COPI Mediated Transport                                                                                | cohort 1, TCGA | yes |
| REACTOME_ENDOSOMAL_VACUOLAR_PATHWAY                                                                            | C2 Reactome                | MSigDB | Genes involved in Endosomal/Vacuolar pathway                                                                             | TCGA           | no  |
| REACTOME_FORMATION_OF_ATP_BY_CHEMIOSMOTIC_COUPLING                                                             | C2 Reactome                | MSigDB | Genes involved in Formation of ATP by chemiosmotic coupling                                                              | TCGA           | no  |
| REACTOME_FORMATION_OF_THE_TERNARY_COMPLEX_AND_SUBSEQUENTLY_THE_43S_COMPLEX                                     | C2 Reactome                | MSigDB | Genes involved in Formation of the ternary complex, and subsequently, the 43S complex                                    | TCGA           | no  |
| REACTOME_INFLUENZA_VIRAL_RNA_TRANSCRIPTION_AND_REPLICATION                                                     | C2 Reactome                | MSigDB | Genes involved in Influenza Viral RNA Transcription and Replication                                                      | TCGA           | no  |
| REACTOME_NONSENSE_MEDIATED_DECAY_ENHANCED_BY_THE_EXON_JUNCTION_COMPLEX                                         | C2 Reactome                | MSigDB | Genes involved in Nonsense Mediated Decay Enhanced by the Exon Junction Complex                                          | TCGA           | no  |
| REACTOME_PEPTIDE_CHAIN_ELONGATION                                                                              | C2 Reactome                | MSigDB | Genes involved in Peptide chain elongation                                                                               | ProxTub, TCGA  | no  |
| REACTOME_SRP_DEPENDENT_COTRANSLATIONAL_PROTEIN_TARGETING_TO_MEMBRANE                                           | C2 Reactome                | MSigDB | Genes involved in SRP-dependent cotranslational protein targeting to membrane                                            | TCGA           | no  |
| REACTOME_TRANSLATION                                                                                           | C2 Reactome                | MSigDB | Genes involved in Translation                                                                                            | TCGA           | no  |
| KEGG_RIBOSOME                                                                                                  | C2 KEGG                    | MSigDB | Ribosome                                                                                                                 | ProxTub, TCGA  | no  |
| GCM_ACTG1                                                                                                      | C4 Computational gene sets | MSigDB | Neighborhood of ACTG1                                                                                                    | TCGA           | no  |
| GCM_ANP32B                                                                                                     | C4 Computational gene sets | MSigDB | Neighborhood of ANP32B                                                                                                   | TCGA           | no  |
| GCM_APEX1                                                                                                      | C4 Computational gene sets | MSigDB | Neighborhood of APEX1                                                                                                    | TCGA           | no  |
| GCM_CFBF                                                                                                       | C4 Computational gene sets | MSigDB | Neighborhood of CFBF                                                                                                     | TCGA           | no  |

|              |                            |        |                                              |                            |     |
|--------------|----------------------------|--------|----------------------------------------------|----------------------------|-----|
| GCM_CSNK2B   | C4 Computational gene sets | MSigDB | Neighborhood of CSNK2B                       | cohort 1, TCGA             | yes |
| GCM_DDX5     | C4 Computational gene sets | MSigDB | Neighborhood of DDX5                         | TCGA                       | no  |
| GCM_HDAC1    | C4 Computational gene sets | MSigDB | Neighborhood of HDAC1                        | cohort 1, TCGA             | yes |
| GCM_MSN      | C4 Computational gene sets | MSigDB | Neighborhood of MSN                          | cohort 1, TCGA             | yes |
| GCM_NPM1     | C4 Computational gene sets | MSigDB | Neighborhood of NPM1                         | TCGA                       | no  |
| GCM_PFN1     | C4 Computational gene sets | MSigDB | Neighborhood of PFN1                         | cohort 1, TCGA             | yes |
| GCM_PPP1CC   | C4 Computational gene sets | MSigDB | Neighborhood of PPP1CC                       | TCGA                       | no  |
| GCM_PSME1    | C4 Computational gene sets | MSigDB | Neighborhood of PSME1                        | TCGA                       | no  |
| GCM_RAD21    | C4 Computational gene sets | MSigDB | Neighborhood of RAD21                        | cohort 1, TCGA             | yes |
| GCM_RAF1     | C4 Computational gene sets | MSigDB | Neighborhood of RAF1                         | cohort 1                   | no  |
| GCM_TPT1     | C4 Computational gene sets | MSigDB | Neighborhood of TPT1                         | cohort 1, TCGA             | yes |
| GNF2_DAP3    | C4 Computational gene sets | MSigDB | Neighborhood of DAP3                         | TCGA                       | no  |
| GNF2_EIF3S6  | C4 Computational gene sets | MSigDB | Neighborhood of EIF3S6                       | TCGA                       | no  |
| GNF2_FBL     | C4 Computational gene sets | MSigDB | Neighborhood of FBL                          | TCGA                       | no  |
| GNF2_GLTSCR2 | C4 Computational gene sets | MSigDB | Neighborhood of GLTSCR2                      | TCGA                       | no  |
| GNF2_MBD4    | C4 Computational gene sets | MSigDB | Neighborhood of MBD4                         | TCGA                       | no  |
| GNF2_MSN     | C4 Computational gene sets | MSigDB | Neighborhood of MSN                          | cohort 1                   | no  |
| GNF2_ST13    | C4 Computational gene sets | MSigDB | Neighborhood of ST13                         | TCGA                       | no  |
| GNF2_TPT1    | C4 Computational gene sets | MSigDB | Neighborhood of TPT1                         | ProxTub, TCGA              | no  |
| GNF2_UBE2I   | C4 Computational gene sets | MSigDB | Neighborhood of UBE2I                        | TCGA                       | no  |
| MODULE_103   | C4 Computational gene sets | MSigDB | Genes in the cancer module 103.              | TCGA                       | no  |
| MODULE_114   | C4 Computational gene sets | MSigDB | Protein biosynthesis and ribosomes.          | TCGA                       | no  |
| MODULE_115   | C4 Computational gene sets | MSigDB | Genes in the cancer module 115.              | TCGA                       | no  |
| MODULE_116   | C4 Computational gene sets | MSigDB | Genes in the cancer module 116.              | TCGA                       | no  |
| MODULE_143   | C4 Computational gene sets | MSigDB | Genes in the cancer module 143.              | TCGA                       | no  |
| MODULE_149   | C4 Computational gene sets | MSigDB | Translation factors.                         | TCGA                       | no  |
| MODULE_150   | C4 Computational gene sets | MSigDB | Translation elongation.                      | cohort 1                   | no  |
| MODULE_151   | C4 Computational gene sets | MSigDB | Genes in the cancer module 151.              | TCGA                       | no  |
| MODULE_155   | C4 Computational gene sets | MSigDB | Genes in the cancer module 155.              | TCGA                       | no  |
| MODULE_22    | C4 Computational gene sets | MSigDB | Genes in the cancer module 22.               | TCGA                       | no  |
| MODULE_245   | C4 Computational gene sets | MSigDB | Genes in the cancer module 245.              | TCGA                       | no  |
| MODULE_29    | C4 Computational gene sets | MSigDB | Genes in the cancer module 29.               | cohort 1,<br>ProxTub, TCGA | no  |
| MODULE_293   | C4 Computational gene sets | MSigDB | Genes in the cancer module 293.              | cohort 1, TCGA             | yes |
| MODULE_299   | C4 Computational gene sets | MSigDB | Genes in the cancer module 299.              | TCGA                       | no  |
| MODULE_306   | C4 Computational gene sets | MSigDB | Glycolysis and TCA cycle.                    | TCGA                       | no  |
| MODULE_307   | C4 Computational gene sets | MSigDB | Oxidative phosphorylation (COX and ATPases). | TCGA                       | no  |
| MODULE_355   | C4 Computational gene sets | MSigDB | Protein folding.                             | TCGA                       | no  |
| MODULE_414   | C4 Computational gene sets | MSigDB | Genes in the cancer module 414.              | TCGA                       | no  |



|              |                            |        |                                 |                |     |
|--------------|----------------------------|--------|---------------------------------|----------------|-----|
| MODULE_429   | C4 Computational gene sets | MSigDB | Genes in the cancer module 429. | TCGA           | no  |
| MODULE_50    | C4 Computational gene sets | MSigDB | Genes in the cancer module 50.  | TCGA           | no  |
| MODULE_62    | C4 Computational gene sets | MSigDB | Genes in the cancer module 62.  | TCGA           | no  |
| MODULE_81    | C4 Computational gene sets | MSigDB | Genes in the cancer module 81.  | TCGA           | no  |
| MODULE_83    | C4 Computational gene sets | MSigDB | Genes in the cancer module 83.  | TCGA           | no  |
| MORF_ACP1    | C4 Computational gene sets | MSigDB | Neighborhood of ACP1            | cohort 1, TCGA | yes |
| MORF_ACTG1   | C4 Computational gene sets | MSigDB | Neighborhood of ACTG1           | cohort 1, TCGA | yes |
| MORF_ANP32B  | C4 Computational gene sets | MSigDB | Neighborhood of ANP32B          | TCGA           | no  |
| MORF_AP2M1   | C4 Computational gene sets | MSigDB | Neighborhood of AP2M1           | TCGA           | no  |
| MORF_AP3D1   | C4 Computational gene sets | MSigDB | Neighborhood of AP3D1           | TCGA           | no  |
| MORF_ATOX1   | C4 Computational gene sets | MSigDB | Neighborhood of ATOX1           | TCGA           | no  |
| MORF_BAG5    | C4 Computational gene sets | MSigDB | Neighborhood of BAG5            | TCGA           | no  |
| MORF_CCNI    | C4 Computational gene sets | MSigDB | Neighborhood of CCNI            | cohort 1, TCGA | yes |
| MORF_CSNK2B  | C4 Computational gene sets | MSigDB | Neighborhood of CSNK2B          | TCGA           | no  |
| MORF_CTBP1   | C4 Computational gene sets | MSigDB | Neighborhood of CTBP1           | TCGA           | no  |
| MORF_DAP     | C4 Computational gene sets | MSigDB | Neighborhood of DAP             | TCGA           | no  |
| MORF_DAP3    | C4 Computational gene sets | MSigDB | Neighborhood of DAP3            | TCGA           | no  |
| MORF_DEK     | C4 Computational gene sets | MSigDB | Neighborhood of DEK             | TCGA           | no  |
| MORF_EIF3S6  | C4 Computational gene sets | MSigDB | Neighborhood of EIF3S6          | TCGA           | no  |
| MORF_EIF4A2  | C4 Computational gene sets | MSigDB | Neighborhood of EIF4A2          | TCGA           | no  |
| MORF_ERH     | C4 Computational gene sets | MSigDB | Neighborhood of ERH             | TCGA           | no  |
| MORF_FBL     | C4 Computational gene sets | MSigDB | Neighborhood of FBL             | TCGA           | no  |
| MORF_G22P1   | C4 Computational gene sets | MSigDB | Neighborhood of G22P1           | TCGA           | no  |
| MORF_GPX4    | C4 Computational gene sets | MSigDB | Neighborhood of GPX4            | TCGA           | no  |
| MORF_HDAC1   | C4 Computational gene sets | MSigDB | Neighborhood of HDAC1           | TCGA           | no  |
| MORF_JUND    | C4 Computational gene sets | MSigDB | Neighborhood of JUND            | TCGA           | no  |
| MORF_MAP2K2  | C4 Computational gene sets | MSigDB | Neighborhood of MAP2K2          | TCGA           | no  |
| MORF_NME2    | C4 Computational gene sets | MSigDB | Neighborhood of NME2            | cohort 1, TCGA | yes |
| MORF_NPM1    | C4 Computational gene sets | MSigDB | Neighborhood of NPM1            | cohort 1, TCGA | yes |
| MORF_PAPSS1  | C4 Computational gene sets | MSigDB | Neighborhood of PAPSS1          | TCGA           | no  |
| MORF_PPP1CA  | C4 Computational gene sets | MSigDB | Neighborhood of PPP1CA          | TCGA           | no  |
| MORF_PPP2R4  | C4 Computational gene sets | MSigDB | Neighborhood of PPP2R4          | TCGA           | no  |
| MORF_PRDX3   | C4 Computational gene sets | MSigDB | Neighborhood of PRDX3           | TCGA           | no  |
| MORF_PRKAR1A | C4 Computational gene sets | MSigDB | Neighborhood of PRKAR1A         | TCGA           | no  |
| MORF_RAN     | C4 Computational gene sets | MSigDB | Neighborhood of RAN             | TCGA           | no  |
| MORF_SART1   | C4 Computational gene sets | MSigDB | Neighborhood of SART1           | cohort 1, TCGA | yes |
| MORF_SKP1A   | C4 Computational gene sets | MSigDB | Neighborhood of SKP1A           | TCGA           | no  |
| MORF_SNRP70  | C4 Computational gene sets | MSigDB | Neighborhood of SNRP70          | cohort 1       | no  |
| MORF_TPT1    | C4 Computational gene sets | MSigDB | Neighborhood of TPT1            | cohort 1, TCGA | yes |

|            |                            |             |                                                                                                                                                 |                |     |
|------------|----------------------------|-------------|-------------------------------------------------------------------------------------------------------------------------------------------------|----------------|-----|
| MORF_UBE2I | C4 Computational gene sets | MSigDB      | Neighborhood of UBE2I                                                                                                                           | cohort 1, TCGA | yes |
| GIMA       | Immune modules             | Nath et al. | General immune module A (immune system process, defense response, regulation of response to stimulus)                                           | cohort 1       | no  |
| GIMB       | Immune modules             | Nath et al. | General immune module B (immune response-activating signal transduction, positive regulation of immune response, activation of immune response) | cohort 1       | no  |

**Tab. S4: Metabolites and metabolite classes included in the targeted metabolomics analysis of cohort 1.**

| <b>Code</b>     | <b>Analyte</b>                                                                                          | <b>Group</b>   |
|-----------------|---------------------------------------------------------------------------------------------------------|----------------|
| Ala             | Alanine                                                                                                 | Amino Acid     |
| Arg             | Arginine                                                                                                | Amino Acid     |
| Asn             | Asparagine                                                                                              | Amino Acid     |
| Asp             | Aspartate                                                                                               | Amino Acid     |
| Cit             | Citrulline                                                                                              | Amino Acid     |
| Gln             | Glutamine                                                                                               | Amino Acid     |
| Glu             | Glutamate                                                                                               | Amino Acid     |
| Gly             | Glycine                                                                                                 | Amino Acid     |
| His             | Histidine                                                                                               | Amino Acid     |
| Ile             | Isoleucine                                                                                              | Amino Acid     |
| Leu             | Leucine                                                                                                 | Amino Acid     |
| Lys             | Lysine                                                                                                  | Amino Acid     |
| Met             | Methionine                                                                                              | Amino Acid     |
| Orn             | Ornithine                                                                                               | Amino Acid     |
| Phe             | Phenylalanine                                                                                           | Amino Acid     |
| Pro             | Proline                                                                                                 | Amino Acid     |
| Ser             | Serine                                                                                                  | Amino Acid     |
| Thr             | Threonine                                                                                               | Amino Acid     |
| Trp             | Tryptophan                                                                                              | Amino Acid     |
| Tyr             | Tyrosine                                                                                                | Amino Acid     |
| Val             | Valine                                                                                                  | Amino Acid     |
| Ac-Orn          | Acetylornithine                                                                                         | Biogenic Amine |
| ADMA            | Asymmetric dimethylarginine                                                                             | Biogenic Amine |
| alpha-AAA       | alpha-Amino adipic acid                                                                                 | Biogenic Amine |
| c4-OH-Pro       | cis-4-Hydroxyproline                                                                                    | Biogenic Amine |
| Carnosine       | Carnosine                                                                                               | Biogenic Amine |
| Creatinine      | Creatinine                                                                                              | Biogenic Amine |
| DOPA            | Dihydroxyphenylalanine                                                                                  | Biogenic Amine |
| Dopamin         | Dopamin                                                                                                 | Biogenic Amine |
| Histamine       | Histamine                                                                                               | Biogenic Amine |
| Kyn             | Kynurenine                                                                                              | Biogenic Amine |
| Met-SO          | Methionine-Sulfoxide                                                                                    | Biogenic Amine |
| Nitro-Tyr       | Nitrotyrosine                                                                                           | Biogenic Amine |
| PEA             | Phenylethylamine                                                                                        | Biogenic Amine |
| Putrescine      | Putrescine                                                                                              | Biogenic Amine |
| Sarcosine       | Sarcosine                                                                                               | Biogenic Amine |
| SDMA            | Symmetric dimethylarginine                                                                              | Biogenic Amine |
| Serotonin       | Serotonin                                                                                               | Biogenic Amine |
| Spermidine      | Spermidine                                                                                              | Biogenic Amine |
| Spermine        | Spermine                                                                                                | Biogenic Amine |
| t4-OH-Pro       | trans-4-Hydroxyproline                                                                                  | Biogenic Amine |
| Taurine         | Taurine                                                                                                 | Biogenic Amine |
| C0              | Carnitine (free)                                                                                        | Acylcarnitine  |
| C2              | Acetylcarnitine                                                                                         | Acylcarnitine  |
| C3              | Propionylcarnitine                                                                                      | Acylcarnitine  |
| C3-DC (C4-OH)   | Glutaryl carnitine                                                                                      | Acylcarnitine  |
| C3-OH           | Hydroxypropionylcarnitine                                                                               | Acylcarnitine  |
| C3:1            | Propenoylcarnitine                                                                                      | Acylcarnitine  |
| C4              | Butyrylcarnitine / Isobutyrylcarnitine                                                                  | Acylcarnitine  |
| C4:1            | Butenoylcarnitine                                                                                       | Acylcarnitine  |
| C5              | Isovalerylcarnitine / 2-Methylbutyrylcarnitine / Valerylcarnitine                                       | Acylcarnitine  |
| C5-DC (C6-OH)   | Glutaryl carnitine (Hydroxyhexanoylcarnitine [= Hydroxycaproylcarnitine])                               | Acylcarnitine  |
| C5-M-DC         | Methylglutaryl carnitine                                                                                | Acylcarnitine  |
| C5-OH (C3-DC-M) | Hydroxyisovalerylcarnitine / Hydroxy-2-methylbutyryl / Hydroxyvalerylcarnitine (Methylmalonylcarnitine) | Acylcarnitine  |

|                |                                                               |               |
|----------------|---------------------------------------------------------------|---------------|
| C5:1           | Tiglylcarnitine / 3-Methyl-crotonylcarnitine                  | Acylcarnitine |
| C5:1-DC        | Glutaconylcarnitine / Mesaconylcarnitine                      | Acylcarnitine |
| C6 (C4:1-DC)   | Hexanoylcarnitine [= Caproylcarnitine] (Fumarylacarnitine)    | Acylcarnitine |
| C6:1           | Hexenoylcarnitine                                             | Acylcarnitine |
| C7-DC          | Pimelylcarnitine                                              | Acylcarnitine |
| C8             | Octanoylcarnitine [= Caprylylcarnitine]                       | Acylcarnitine |
| C8:1           | Octanoylcarnitine                                             | Acylcarnitine |
| C9             | Nonanoylcarnitine [= Pelargonylcarnitine]                     | Acylcarnitine |
| C10            | Decanoylcarnitine [= Caprylylcarnitine]                       | Acylcarnitine |
| C10:1          | Decenoylcarnitine                                             | Acylcarnitine |
| C10:2          | Decadienoylcarnitine                                          | Acylcarnitine |
| C12            | Dodecanoylcarnitine [= Laurylcarnitine]                       | Acylcarnitine |
| C12-DC         | Dodecanedioylcarnitine                                        | Acylcarnitine |
| C12:1          | Dodecenoylcarnitine                                           | Acylcarnitine |
| C14            | Tetradecanoylcarnitine [= Myristylcarnitine]                  | Acylcarnitine |
| C14:1          | Tetradecanoylcarnitine [= Myristoleylcarnitine]               | Acylcarnitine |
| C14:1-OH       | Hydroxytetradecenoylcarnitine [= Hydroxymyristoleylcarnitine] | Acylcarnitine |
| C14:2          | Tetradecadienoylcarnitine                                     | Acylcarnitine |
| C14:2-OH       | Hydroxytetradecadienoylcarnitine                              | Acylcarnitine |
| C16            | Hexadecanoylcarnitine [= Palmitoylcarnitine]                  | Acylcarnitine |
| C16-OH         | Hydroxyhexadecanoylcarnitine [= Hydroxypalmitoylcarnitine]    | Acylcarnitine |
| C16:1          | Hexadecenoylcarnitine [= Palmitoleylcarnitine]                | Acylcarnitine |
| C16:1-OH       | Hydroxyhexadecenoylcarnitine [= Hydroxypalmitoleylcarnitine]  | Acylcarnitine |
| C16:2          | Hexadecadienoylcarnitine                                      | Acylcarnitine |
| C16:2-OH       | Hydroxyhexadecadienoylcarnitine                               | Acylcarnitine |
| C18            | Octadecanoylcarnitine [= Stearylacarnitine]                   | Acylcarnitine |
| C18:1          | Octadecenoylcarnitine [= Oleylcarnitine]                      | Acylcarnitine |
| C18:1-OH       | Hydroxyoctadecenoylcarnitine [= Hydroxyoleylcarnitine]        | Acylcarnitine |
| C18:2          | Octadecadienoylcarnitine [= Linoleylcarnitine]                | Acylcarnitine |
| lysoPC a C6:0  | Lysophosphatidylcholine with acyl residue C6:0                | Lyso-PC       |
| lysoPC a C14:0 | Lysophosphatidylcholine with acyl residue C14:0               | Lyso-PC       |
| lysoPC a C16:0 | Lysophosphatidylcholine with acyl residue C16:0               | Lyso-PC       |
| lysoPC a C16:1 | Lysophosphatidylcholine with acyl residue C16:1               | Lyso-PC       |
| lysoPC a C17:0 | Lysophosphatidylcholine with acyl residue C17:0               | Lyso-PC       |
| lysoPC a C18:0 | Lysophosphatidylcholine with acyl residue C18:0               | Lyso-PC       |
| lysoPC a C18:1 | Lysophosphatidylcholine with acyl residue C18:1               | Lyso-PC       |
| lysoPC a C18:2 | Lysophosphatidylcholine with acyl residue C18:2               | Lyso-PC       |
| lysoPC a C20:3 | Lysophosphatidylcholine with acyl residue C20:3               | Lyso-PC       |
| lysoPC a C20:4 | Lysophosphatidylcholine with acyl residue C20:4               | Lyso-PC       |
| lysoPC a C24:0 | Lysophosphatidylcholine with acyl residue C24:0               | Lyso-PC       |
| lysoPC a C26:0 | Lysophosphatidylcholine with acyl residue C26:0               | Lyso-PC       |
| lysoPC a C26:1 | Lysophosphatidylcholine with acyl residue C26:1               | Lyso-PC       |
| lysoPC a C28:0 | Lysophosphatidylcholine with acyl residue C28:0               | Lyso-PC       |
| lysoPC a C28:1 | Lysophosphatidylcholine with acyl residue C28:1               | Lyso-PC       |
| PC aa C24:0    | Phosphatidylcholine with diacyl residue sum C24:0             | Diacyl-PC     |
| PC aa C26:0    | Phosphatidylcholine with diacyl residue sum C26:0             | Diacyl-PC     |
| PC aa C28:1    | Phosphatidylcholine with diacyl residue sum C28:1             | Diacyl-PC     |
| PC aa C30:0    | Phosphatidylcholine with diacyl residue sum C30:0             | Diacyl-PC     |
| PC aa C30:2    | Phosphatidylcholine with diacyl residue sum C30:2             | Diacyl-PC     |
| PC aa C32:0    | Phosphatidylcholine with diacyl residue sum C32:0             | Diacyl-PC     |
| PC aa C32:1    | Phosphatidylcholine with diacyl residue sum C32:1             | Diacyl-PC     |
| PC aa C32:2    | Phosphatidylcholine with diacyl residue sum C32:2             | Diacyl-PC     |
| PC aa C32:3    | Phosphatidylcholine with diacyl residue sum C32:3             | Diacyl-PC     |
| PC aa C34:1    | Phosphatidylcholine with diacyl residue sum C34:1             | Diacyl-PC     |
| PC aa C34:2    | Phosphatidylcholine with diacyl residue sum C34:2             | Diacyl-PC     |
| PC aa C34:3    | Phosphatidylcholine with diacyl residue sum C34:3             | Diacyl-PC     |
| PC aa C34:4    | Phosphatidylcholine with diacyl residue sum C34:4             | Diacyl-PC     |
| PC aa C36:0    | Phosphatidylcholine with diacyl residue sum C36:0             | Diacyl-PC     |



|               |                                                       |                   |
|---------------|-------------------------------------------------------|-------------------|
| PC ae C44:5   | Phosphatidylcholine with acyl-alkyl residue sum C44:5 | Acyl/Alkyl-PC     |
| PC ae C44:6   | Phosphatidylcholine with acyl-alkyl residue sum C44:6 | Acyl/Alkyl-PC     |
| SM (OH) C14:1 | Hydroxysphingomyelin with acyl residue sum C14:1      | OH-Sphingomyelin  |
| SM (OH) C16:1 | Hydroxysphingomyelin with acyl residue sum C16:1      | OH-Sphingomyelin  |
| SM (OH) C22:1 | Hydroxysphingomyelin with acyl residue sum C22:1      | OH-Sphingomyelin  |
| SM (OH) C22:2 | Hydroxysphingomyelin with acyl residue sum C22:2      | OH-Sphingomyelin  |
| SM (OH) C24:1 | Hydroxysphingomyelin with acyl residue sum C24:1      | OH-Sphingomyelin  |
| SM C16:0      | Sphingomyelin with acyl residue sum C16:0             | Sphingomyelin     |
| SM C16:1      | Sphingomyelin with acyl residue sum C16:1             | Sphingomyelin     |
| SM C18:0      | Sphingomyelin with acyl residue sum C18:0             | Sphingomyelin     |
| SM C18:1      | Sphingomyelin with acyl residue sum C18:1             | Sphingomyelin     |
| SM C20:2      | Sphingomyelin with acyl residue sum C20:2             | Sphingomyelin     |
| SM C22:3      | Sphingomyelin with acyl residue sum C22:3             | Sphingomyelin     |
| SM C24:0      | Sphingomyelin with acyl residue sum C24:0             | Sphingomyelin     |
| SM C24:1      | Sphingomyelin with acyl residue sum C24:1             | Sphingomyelin     |
| SM C26:0      | Sphingomyelin with acyl residue sum C26:0             | Sphingomyelin     |
| SM C26:1      | Sphingomyelin with acyl residue sum C26:1             | Sphingomyelin     |
| H1            | Glucose and other Hexoses                             | Energy Metabolism |
| Glc           | Glucose                                               | Energy Metabolism |
| Ribose        | Ribose                                                | Energy Metabolism |
| 2-HG          | 2-hydroxyglutaric acid                                | Energy Metabolism |
| alpha-KGA     | alpha-ketoglutaric acid (=2-Oxoglutaric acid)         | Energy Metabolism |
| Fum           | Fumaric acid                                          | Energy Metabolism |
| Mal           | Malic acid                                            | Energy Metabolism |
| Suc           | Succinic acid                                         | Energy Metabolism |
| 2-HBA         | 2-hydroxybutyric acid                                 | Energy Metabolism |
| 3-HBA         | 3-hydroxybutyric acid                                 | Energy Metabolism |
| Lac           | Lactic acid                                           | Energy Metabolism |
| Pyr + OAA     | Sum of Pyruvate + Oxalacetic acid                     | Energy Metabolism |
| CitA          | Citric acid                                           | Energy Metabolism |
| Isocit        | Isocitric acid                                        | Energy Metabolism |

**Tab. S5: Immuno-oncological marker proteins and associated biological processes.**

| Marker | Process 1                      | Process 2                      | Process 3                      | Process 4                      |
|--------|--------------------------------|--------------------------------|--------------------------------|--------------------------------|
| ADA    | Metabolism and Autophagy       |                                |                                |                                |
| ADGRG1 | Vascular and Tissue Remodeling |                                |                                |                                |
| ANG-1  | Vascular and Tissue Remodeling |                                |                                |                                |
| ANGPT2 | Vascular and Tissue Remodeling |                                |                                |                                |
| ARG1   | Metabolism and Autophagy       |                                |                                |                                |
| CAIX   | Metabolism and Autophagy       |                                |                                |                                |
| CASP-8 | Apoptosis and Cell Killing     |                                |                                |                                |
| CCL17  | Chemotaxis                     | Suppression of Tumor Immunity  |                                |                                |
| CCL19  | Chemotaxis                     | Suppression of Tumor Immunity  |                                |                                |
| CCL20  | Chemotaxis                     | Suppression of Tumor Immunity  |                                |                                |
| CCL23  | Chemotaxis                     | Vascular and Tissue Remodeling |                                |                                |
| CCL3   | Chemotaxis                     |                                |                                |                                |
| CCL4   | Chemotaxis                     |                                |                                |                                |
| CD244  | Promotion of Tumor Immunity    |                                |                                |                                |
| CD27   | Promotion of Tumor Immunity    |                                |                                |                                |
| CD28   | Promotion of Tumor Immunity    |                                |                                |                                |
| CD4    | Promotion of Tumor Immunity    | Suppression of Tumor Immunity  |                                |                                |
| CD40   | Promotion of Tumor Immunity    |                                |                                |                                |
| CD40-L | Apoptosis and Cell Killing     | Promotion of Tumor Immunity    |                                |                                |
| CD5    | Promotion of Tumor Immunity    | Suppression of Tumor Immunity  |                                |                                |
| CD70   | Promotion of Tumor Immunity    |                                |                                |                                |
| CD83   | Promotion of Tumor Immunity    |                                |                                |                                |
| CD8A   | Promotion of Tumor Immunity    |                                |                                |                                |
| CRTAM  | Promotion of Tumor Immunity    |                                |                                |                                |
| CSF-1  | Suppression of Tumor Immunity  |                                |                                |                                |
| CX3CL1 | Promotion of Tumor Immunity    | Chemotaxis                     |                                |                                |
| CXCL1  | Chemotaxis                     | Suppression of Tumor Immunity  | Vascular and Tissue Remodeling |                                |
| CXCL10 | Chemotaxis                     | Promotion of Tumor Immunity    | Vascular and Tissue Remodeling |                                |
| CXCL11 | Chemotaxis                     | Promotion of Tumor Immunity    | Suppression of Tumor Immunity  | Vascular and Tissue Remodeling |
| CXCL12 | Suppression of Tumor Immunity  | Vascular and Tissue Remodeling | Chemotaxis                     |                                |
| CXCL13 | Promotion of                   | Suppression of                 | Chemotaxis                     |                                |

|            |                                |                                |                                |  |
|------------|--------------------------------|--------------------------------|--------------------------------|--|
|            | Tumor Immunity                 | Tumor Immunity                 |                                |  |
| CXCL5      | Chemotaxis                     | Suppression of Tumor Immunity  | Vascular and Tissue Remodeling |  |
| CXCL9      | Chemotaxis                     | Promotion of Tumor Immunity    | Vascular and Tissue Remodeling |  |
| DCN        | Vascular and Tissue Remodeling |                                |                                |  |
| EGF        | Vascular and Tissue Remodeling |                                |                                |  |
| FASLG      | Apoptosis and Cell Killing     |                                |                                |  |
| FGF2       | Vascular and Tissue Remodeling |                                |                                |  |
| Gal-1      | Suppression of Tumor Immunity  | Vascular and Tissue Remodeling |                                |  |
| Gal-9      | Apoptosis and Cell Killing     | Suppression of Tumor Immunity  | Vascular and Tissue Remodeling |  |
| GZMA       | Apoptosis and Cell Killing     |                                |                                |  |
| GZMB       | Apoptosis and Cell Killing     |                                |                                |  |
| GZMH       | Apoptosis and Cell Killing     |                                |                                |  |
| HGF        | Vascular and Tissue Remodeling |                                |                                |  |
| HO-1       | Metabolism and Autophagy       |                                |                                |  |
| ICOSLG     | Promotion of Tumor Immunity    |                                |                                |  |
| IFN-beta   | Promotion of Tumor Immunity    |                                |                                |  |
| IFN-gamma  | Promotion of Tumor Immunity    |                                |                                |  |
| IL-1 alpha | Promotion of Tumor Immunity    | Suppression of Tumor Immunity  | Vascular and Tissue Remodeling |  |
| IL10       | Suppression of Tumor Immunity  |                                |                                |  |
| IL12       | Promotion of Tumor Immunity    |                                |                                |  |
| IL12RB1    | Promotion of Tumor Immunity    |                                |                                |  |
| IL13       | Suppression of Tumor Immunity  |                                |                                |  |
| IL18       | Promotion of Tumor Immunity    | Suppression of Tumor Immunity  |                                |  |
| IL2        | Promotion of Tumor Immunity    |                                |                                |  |
| IL-21      | Promotion of Tumor Immunity    |                                |                                |  |
| IL33       | Suppression of Tumor Immunity  |                                |                                |  |
| IL-35      | Suppression of Tumor Immunity  |                                |                                |  |
| IL4        | Suppression of Tumor Immunity  |                                |                                |  |
| IL5        | Suppression of Tumor Immunity  |                                |                                |  |
| IL6        | Promotion of Tumor Immunity    | Suppression of Tumor Immunity  |                                |  |
| IL7        | Promotion of Tumor Immunity    |                                |                                |  |
| IL8        | Suppression of                 | Vascular and Tissue            | Chemotaxis                     |  |



|                |                                |                                |                                |  |
|----------------|--------------------------------|--------------------------------|--------------------------------|--|
|                | Tumor Immunity                 | Remodeling                     |                                |  |
| KLRD1          | Promotion of Tumor Immunity    |                                |                                |  |
| LAMP3          | Suppression of Tumor Immunity  |                                |                                |  |
| LAP TGF-beta-1 | Suppression of Tumor Immunity  |                                |                                |  |
| MCP-1          | Chemotaxis                     | Vascular and Tissue Remodeling |                                |  |
| MCP-2          | Chemotaxis                     |                                |                                |  |
| MCP-3          | Chemotaxis                     |                                |                                |  |
| MCP-4          | Chemotaxis                     | Suppression of Tumor Immunity  | Vascular and Tissue Remodeling |  |
| MIC-A/B        | Suppression of Tumor Immunity  |                                |                                |  |
| MMP12          | Suppression of Tumor Immunity  | Vascular and Tissue Remodeling |                                |  |
| MMP7           | Apoptosis and Cell Killing     | Suppression of Tumor Immunity  |                                |  |
| NCR1           | Promotion of Tumor Immunity    |                                |                                |  |
| NOS3           | Vascular and Tissue Remodeling |                                |                                |  |
| PDCD1          | Suppression of Tumor Immunity  |                                |                                |  |
| PDGF subunit B | Vascular and Tissue Remodeling |                                |                                |  |
| PD-L1          | Suppression of Tumor Immunity  |                                |                                |  |
| PD-L2          | Suppression of Tumor Immunity  |                                |                                |  |
| PGF            | Vascular and Tissue Remodeling |                                |                                |  |
| PTN            | Vascular and Tissue Remodeling |                                |                                |  |
| TIE2           | Vascular and Tissue Remodeling |                                |                                |  |
| TNF            | Promotion of Tumor Immunity    | Suppression of Tumor Immunity  | Vascular and Tissue Remodeling |  |
| TNFRSF12 A     | Apoptosis and Cell Killing     | Vascular and Tissue Remodeling |                                |  |
| TNFRSF21       | Apoptosis and Cell Killing     |                                |                                |  |
| TNFRSF4        | Promotion of Tumor Immunity    |                                |                                |  |
| TNFRSF9        | Promotion of Tumor Immunity    |                                |                                |  |
| TNFSF14        | Promotion of Tumor Immunity    |                                |                                |  |
| TRAIL          | Apoptosis and Cell Killing     |                                |                                |  |
| TWEAK          | Apoptosis and Cell Killing     | Vascular and Tissue Remodeling |                                |  |
| VEGFA          | Vascular and Tissue Remodeling |                                |                                |  |
| VEGFC          | Vascular and Tissue Remodeling |                                |                                |  |
| VEGFR-2        | Vascular and Tissue Remodeling |                                |                                |  |

**Tab. S6: Differentially methylated CpG sites in candidate gene regions (TCGA KIRC cohort).** Shown are those positions with significantly decreased methylation in tumor tissues (difference in  $\beta$ -values (tumor-normal)  $\leq -0.1$ ; p-value  $< 0.05$ ), which were negatively correlated with gene expression ( $R_s < -0.3$ ; p-value  $< 0.05$ ).

| Gene Symbol | CpG site   | Difference in $\beta$ -values (tumor-normal) unpaired | p-value unpaired | Difference in $\beta$ -values (tumor-normal) paired | p-value paired | R (Spearman) | p-value (Spearman) |
|-------------|------------|-------------------------------------------------------|------------------|-----------------------------------------------------|----------------|--------------|--------------------|
| ADM         | cg03246478 | -0.28                                                 | 1.13E-59         | -0.28                                               | 3.73E-25       | -0.34        | 7.87E-09           |
| ALDOA       | cg00583733 | -0.14                                                 | 1.38E-45         | -0.14                                               | 2.19E-22       | -0.44        | 1.64E-14           |
|             | cg04416734 | -0.16                                                 | 1.79E-45         | -0.16                                               | 5.33E-22       | -0.47        | < 1.00E-16         |
| ALDOC       | cg15835620 | -0.25                                                 | 3.15E-33         | -0.19                                               | 1.13E-19       | -0.48        | < 1.00E-16         |
|             | cg14668747 | -0.20                                                 | 2.31E-31         | -0.13                                               | 1.36E-12       | -0.47        | 4.44E-16           |
|             | cg27183188 | -0.26                                                 | 1.87E-30         | -0.17                                               | 4.16E-14       | -0.52        | < 1.00E-16         |
| ANXA2       | cg13313836 | -0.22                                                 | 2.30E-49         | -0.25                                               | 1.21E-24       | -0.49        | < 1.00E-16         |
|             | cg06738887 | -0.38                                                 | 6.52E-58         | -0.37                                               | 4.90E-25       | -0.46        | 1.33E-15           |
| ANXA4       | cg12518775 | -0.15                                                 | 9.42E-41         | -0.15                                               | 3.55E-21       | -0.31        | 1.96E-07           |
|             | cg25099065 | -0.12                                                 | 2.19E-20         | -0.12                                               | 9.25E-14       | -0.31        | 1.14E-07           |
| ANXA5       | cg19130824 | -0.16                                                 | 1.47E-44         | -0.19                                               | 1.34E-22       | -0.34        | 4.99E-09           |
|             | cg10728351 | -0.30                                                 | 1.74E-43         | -0.30                                               | 2.91E-23       | -0.42        | 4.38E-13           |
| B2M         | cg18696027 | -0.19                                                 | 4.83E-39         | -0.22                                               | 1.07E-21       | -0.38        | 1.46E-10           |
| BNIP3       | cg02365648 | -0.23                                                 | 1.44E-32         | -0.21                                               | 6.62E-22       | -0.44        | 2.98E-14           |
| C3          | cg14279361 | -0.21                                                 | 2.55E-19         | -0.16                                               | 2.11E-15       | -0.36        | 7.24E-10           |
| CCND1       | cg09637363 | -0.14                                                 | 3.19E-45         | -0.13                                               | 4.35E-23       | -0.34        | 1.04E-08           |
|             | cg13608094 | -0.13                                                 | 3.63E-37         | -0.14                                               | 5.36E-21       | -0.34        | 1.07E-08           |
|             | cg12266049 | -0.14                                                 | 3.90E-28         | -0.16                                               | 8.82E-20       | -0.38        | 5.83E-11           |
|             | cg19047670 | -0.18                                                 | 6.71E-44         | -0.18                                               | 6.12E-23       | -0.31        | 2.45E-07           |
| EDIL3       | cg19722082 | -0.25                                                 | 1.41E-35         | -0.25                                               | 6.12E-22       | -0.33        | 3.39E-08           |
| EGLN3       | cg06816517 | -0.23                                                 | 1.71E-60         | -0.24                                               | 3.57E-25       | -0.43        | 1.17E-13           |
|             | cg24170040 | -0.56                                                 | 7.06E-63         | -0.54                                               | 3.28E-25       | -0.42        | 4.13E-13           |
|             | cg02000275 | -0.28                                                 | 4.94E-52         | -0.28                                               | 6.85E-25       | -0.41        | 1.20E-12           |
|             | cg13728308 | -0.31                                                 | 7.75E-58         | -0.29                                               | 5.33E-25       | -0.49        | < 1.00E-16         |
| GAPDH       | cg26826729 | -0.36                                                 | 5.76E-56         | -0.32                                               | 9.00E-25       | -0.42        | 3.31E-13           |
| GLRX        | cg02354658 | -0.24                                                 | 3.43E-36         | -0.25                                               | 4.83E-22       | -0.40        | 5.18E-12           |
|             | cg22689909 | -0.32                                                 | 2.08E-45         | -0.29                                               | 9.40E-24       | -0.35        | 4.63E-09           |
|             | cg16677191 | -0.39                                                 | 3.17E-56         | -0.38                                               | 4.32E-25       | -0.33        | 2.55E-08           |
| HLA-B       | cg13031097 | -0.34                                                 | 5.15E-58         | -0.32                                               | 4.05E-25       | -0.32        | 6.55E-08           |
|             | cg23923934 | -0.20                                                 | 7.84E-53         | -0.25                                               | 1.34E-24       | -0.42        | 7.62E-13           |
|             | cg27529346 | -0.15                                                 | 2.95E-45         | -0.19                                               | 4.61E-21       | -0.40        | 8.34E-11           |
|             | cg03154077 | -0.16                                                 | 7.61E-54         | -0.16                                               | 3.97E-25       | -0.37        | 1.62E-10           |
|             | cg11187245 | -0.28                                                 | 3.03E-54         | -0.29                                               | 8.63E-25       | -0.41        | 9.08E-13           |
| HLA-C       | cg18511546 | -0.21                                                 | 7.46E-56         | -0.23                                               | 6.57E-25       | -0.39        | 2.53E-11           |
|             | cg26392102 | -0.14                                                 | 5.17E-49         | -0.15                                               | 2.25E-24       | -0.38        | 6.43E-11           |
|             | cg17096289 | -0.13                                                 | 1.97E-13         | -0.18                                               | 8.26E-20       | -0.40        | 9.08E-12           |
|             | cg14931776 | -0.16                                                 | 1.23E-18         | -0.13                                               | 1.01E-18       | -0.33        | 2.78E-08           |
| HLA-DMA     | cg03531211 | -0.13                                                 | 1.88E-41         | -0.14                                               | 1.77E-23       | -0.52        | < 1.00E-16         |
|             | cg24421410 | -0.22                                                 | 1.99E-38         | -0.23                                               | 6.50E-23       | -0.37        | 1.75E-10           |
|             | cg02806715 | -0.23                                                 | 6.50E-33         | -0.28                                               | 3.01E-22       | -0.41        | 1.20E-12           |
|             | cg08735211 | -0.10                                                 | 3.51E-21         | -0.13                                               | 2.59E-19       | -0.52        | < 1.00E-16         |
|             | cg24129356 | -0.29                                                 | 8.13E-44         | -0.31                                               | 1.19E-23       | -0.45        | 8.88E-15           |
|             | cg03520342 | -0.26                                                 | 7.44E-50         | -0.24                                               | 1.79E-23       | -0.41        | 9.76E-13           |
|             | cg07151443 | -0.28                                                 | 7.26E-54         | -0.25                                               | 1.37E-24       | -0.37        | 1.86E-10           |
| HLA-E       | cg21366673 | -0.12                                                 | 4.07E-38         | -0.12                                               | 1.19E-20       | -0.38        | 7.19E-11           |
|             | cg23235965 | -0.29                                                 | 3.20E-59         | -0.31                                               | 3.81E-25       | -0.32        | 9.73E-08           |
| HTRA1       | cg00701951 | -0.43                                                 | 7.11E-60         | -0.42                                               | 3.57E-25       | -0.37        | 2.06E-10           |
| IFI30       | cg04610450 | -0.17                                                 | 3.46E-46         | -0.15                                               | 1.60E-24       | -0.31        | 2.25E-07           |
| ITGB2       | cg07274406 | -0.16                                                 | 1.03E-36         | -0.18                                               | 1.78E-22       | -0.51        | < 1.00E-16         |
|             | cg06654697 | -0.21                                                 | 1.56E-37         | -0.20                                               | 8.81E-21       | -0.57        | < 1.00E-16         |
|             | cg18663307 | -0.11                                                 | 3.19E-40         | -0.12                                               | 7.44E-22       | -0.60        | < 1.00E-16         |

|        |            |            |          |          |          |          |            |
|--------|------------|------------|----------|----------|----------|----------|------------|
|        | cg14112356 | -0.12      | 1.08E-13 | -0.11    | 1.54E-11 | -0.40    | 1.22E-11   |
|        | cg21006727 | -0.10      | 1.10E-21 | -0.17    | 2.44E-21 | -0.34    | 7.45E-09   |
| KCNMA1 | cg16055185 | -0.17      | 3.14E-26 | -0.15    | 1.85E-17 | -0.41    | 3.34E-12   |
|        | cg26353166 | -0.27      | 7.74E-50 | -0.24    | 1.07E-24 | -0.42    | 6.11E-13   |
|        | cg02172819 | -0.14      | 2.31E-45 | -0.12    | 1.27E-19 | -0.35    | 2.58E-09   |
|        | cg18738985 | -0.20      | 4.94E-24 | -0.15    | 6.12E-16 | -0.31    | 1.16E-07   |
|        | cg03299991 | -0.21      | 1.19E-46 | -0.18    | 3.31E-23 | -0.30    | 3.56E-07   |
|        |            | cg02577773 | -0.18    | 4.52E-41 | -0.18    | 2.33E-22 | -0.34      |
| KLF7   | cg17781464 | -0.11      | 1.64E-20 | -0.11    | 1.30E-12 | -0.40    | 5.26E-12   |
| KRT8   | cg21173150 | -0.25      | 3.01E-57 | -0.26    | 5.33E-25 | -0.41    | 1.05E-12   |
|        |            | cg24531955 | -0.49    | 3.28E-61 | -0.45    | 3.43E-25 | -0.46      |
| LOXL2  | cg24258705 | -0.13      | 2.00E-37 | -0.19    | 9.90E-23 | -0.38    | 5.42E-11   |
| MET    | cg04227278 | -0.14      | 9.28E-37 | -0.14    | 6.99E-20 | -0.36    | 1.24E-09   |
| NDRG1  | cg14520913 | -0.39      | 6.77E-61 | -0.37    | 3.73E-25 | -0.37    | 2.33E-10   |
| NNMT   | cg09830083 | -0.28      | 3.51E-52 | -0.27    | 9.19E-25 | -0.39    | 2.29E-11   |
| P4HA2  | cg26835683 | -0.14      | 2.68E-17 | -0.13    | 1.89E-12 | -0.32    | 6.44E-08   |
| PEA15  | cg24882709 | -0.38      | 6.41E-59 | -0.37    | 3.43E-25 | -0.42    | 2.15E-13   |
|        | cg08194405 | -0.18      | 5.74E-57 | -0.21    | 3.77E-25 | -0.36    | 7.48E-10   |
|        | cg26693553 | -0.26      | 6.13E-24 | -0.18    | 9.09E-15 | -0.32    | 1.03E-07   |
| PGF    | cg15890469 | -0.16      | 1.31E-49 | -0.17    | 3.20E-24 | -0.43    | 1.65E-13   |
| PKM2   | cg22234930 | -0.26      | 5.22E-55 | -0.26    | 7.45E-25 | -0.32    | 7.00E-08   |
| PLIN2  | cg03885527 | -0.28      | 2.88E-48 | -0.29    | 1.21E-24 | -0.52    | < 1.00E-16 |
|        | cg14334810 | -0.20      | 3.93E-42 | -0.22    | 1.91E-22 | -0.39    | 1.76E-11   |
| PLOD2  | cg24291309 | -0.19      | 2.48E-50 | -0.21    | 2.07E-24 | -0.35    | 2.70E-09   |
| RBPMS  | cg02723975 | -0.16      | 2.48E-17 | -0.15    | 5.98E-11 | -0.35    | 1.94E-09   |
|        | cg24296569 | -0.17      | 9.99E-24 | -0.16    | 2.23E-14 | -0.35    | 3.20E-09   |
|        | cg14895559 | -0.20      | 8.87E-22 | -0.17    | 7.17E-13 | -0.34    | 7.65E-09   |
|        | cg03186436 | -0.17      | 4.45E-33 | -0.18    | 9.95E-20 | -0.39    | 4.04E-11   |
|        | cg00997969 | -0.30      | 1.77E-60 | -0.30    | 3.73E-25 | -0.39    | 1.88E-11   |
| SCARB1 | cg22775642 | -0.28      | 8.65E-59 | -0.29    | 4.70E-25 | -0.43    | 1.69E-13   |
|        | cg13075279 | -0.22      | 1.13E-49 | -0.22    | 3.38E-23 | -0.35    | 3.73E-09   |
|        | cg14846380 | -0.24      | 7.38E-51 | -0.21    | 8.23E-24 | -0.35    | 1.67E-09   |
|        | cg23460943 | -0.37      | 8.46E-51 | -0.32    | 1.79E-24 | -0.42    | 4.25E-13   |
|        | cg15282973 | -0.42      | 1.32E-58 | -0.37    | 6.44E-25 | -0.47    | < 1.00E-16 |
| SCD    | cg06400428 | -0.17      | 2.03E-42 | -0.17    | 2.95E-19 | -0.30    | 4.15E-07   |
|        | cg03440556 | -0.33      | 3.48E-47 | -0.30    | 8.96E-23 | -0.36    | 8.34E-10   |
|        | cg02237755 | -0.12      | 5.63E-27 | -0.12    | 8.52E-17 | -0.42    | 4.08E-13   |
|        | cg16744911 | -0.21      | 2.33E-48 | -0.24    | 4.09E-24 | -0.50    | < 1.00E-16 |
| SHMT2  | cg11851129 | -0.10      | 3.92E-48 | -0.15    | 2.10E-23 | -0.42    | 2.51E-13   |
|        | cg19535267 | -0.22      | 6.74E-49 | -0.23    | 1.90E-23 | -0.52    | < 1.00E-16 |
|        | cg12639933 | -0.27      | 2.29E-59 | -0.26    | 4.05E-25 | -0.45    | 3.33E-15   |
|        | cg08163918 | -0.40      | 2.89E-62 | -0.38    | 3.28E-25 | -0.56    | < 1.00E-16 |
| SLAMF7 | cg04244970 | -0.15      | 1.12E-51 | -0.19    | 2.82E-24 | -0.47    | 2.22E-16   |
|        | cg07837085 | -0.21      | 8.48E-55 | -0.25    | 4.41E-25 | -0.31    | 2.26E-07   |
| SPARC  | cg10505630 | -0.13      | 2.50E-52 | -0.14    | 2.25E-24 | -0.32    | 4.46E-08   |
| TRIB3  | cg15799353 | -0.22      | 1.40E-47 | -0.24    | 5.13E-24 | -0.59    | < 1.00E-16 |
|        | cg24966406 | -0.16      | 2.66E-34 | -0.15    | 1.80E-18 | -0.54    | < 1.00E-16 |
| VCAM1  | cg24593324 | -0.39      | 4.77E-58 | -0.35    | 4.50E-25 | -0.31    | 1.25E-07   |
| VEGFA  | cg13320558 | -0.23      | 3.25E-49 | -0.22    | 2.10E-23 | -0.46    | 1.33E-15   |
|        | cg01298514 | -0.35      | 2.84E-60 | -0.33    | 4.90E-25 | -0.43    | 1.25E-13   |
|        | cg18022921 | -0.28      | 4.13E-58 | -0.27    | 1.19E-24 | -0.45    | 7.99E-15   |
|        | cg00539360 | -0.32      | 4.69E-60 | -0.32    | 4.23E-25 | -0.51    | < 1.00E-16 |
|        | cg25343661 | -0.34      | 2.31E-58 | -0.35    | 3.50E-25 | -0.41    | 1.37E-12   |
|        | cg25373579 | -0.26      | 1.30E-58 | -0.24    | 6.44E-25 | -0.45    | 2.89E-15   |
| VIM    | cg01353538 | -0.17      | 1.23E-57 | -0.16    | 4.70E-25 | -0.32    | 7.66E-08   |
|        | cg10790685 | -0.36      | 2.47E-46 | -0.32    | 2.60E-24 | -0.30    | 3.51E-07   |
|        | cg14260889 | -0.31      | 1.35E-61 | -0.33    | 3.50E-25 | -0.41    | 1.47E-12   |

**Tab. S7: Somatic mutations of candidate genes in the TCGA patient cohort.**

| Hugo Symbol | NCBI Build | Chromosome | Start Position | End Position | Strand | Variant Classific. | Variant Type | Reference Allele | Tumor Seq Allele1 | Tumor Seq Allele2 | Tumor Sample Barcode         |
|-------------|------------|------------|----------------|--------------|--------|--------------------|--------------|------------------|-------------------|-------------------|------------------------------|
| ABCA1       | 37         | 9          | 107651383      | 107651383    | +      | Missense Mutation  | SNV          | A                | A                 | T                 | TCGA-B0-4823-01A-02D-1421-08 |
| ABCA1       | 37         | 9          | 107618219      | 107618219    | +      | Missense Mutation  | SNV          | C                | C                 | G                 | TCGA-B0-5088-01A-01D-1462-08 |
| ABCA1       | 37         | 9          | 107558370      | 107558370    | +      | Missense Mutation  | SNV          | G                | G                 | C                 | TCGA-B0-5109-01A-02D-1421-08 |
| ABCA1       | 37         | 9          | 107589428      | 107589428    | +      | Missense Mutation  | SNV          | C                | C                 | T                 | TCGA-BP-4803-01              |
| ABCA1       | 37         | 9          | 107558674      | 107558674    | +      | Missense Mutation  | SNV          | A                | A                 | C                 | TCGA-BP-4992-01              |
| ABCA1       | 37         | 9          | 107564349      | 107564349    | +      | Missense Mutation  | SNV          | G                | G                 | T                 | TCGA-BP-5008-01              |
| ABCA1       | 37         | 9          | 107573139      | 107573139    | +      | Missense Mutation  | SNV          | T                | T                 | C                 | TCGA-CJ-4873-01A-01D-1373-10 |
| ABCA1       | 37         | 9          | 107573110      | 107573110    | +      | Missense Mutation  | SNV          | C                | C                 | A                 | TCGA-CZ-5460-01A-01D-1501-10 |
| ABI3BP      | 37         | 3          | 100595388      | 100595388    | +      | Missense Mutation  | SNV          | C                | C                 | G                 | TCGA-B0-5080-01A-01D-1501-10 |
| ACLY        | 37         | 17         | 40049295       | 40049295     | +      | Missense Mutation  | SNV          | T                | T                 | G                 | TCGA-A3-3380-01A-01D-0966-08 |
| ACLY        | 37         | 17         | 40028034       | 40028034     | +      | Missense Mutation  | SNV          | C                | C                 | T                 | TCGA-A3-3383-01A-01D-0966-08 |
| ACLY        | 37         | 17         | 40039402       | 40039402     | +      | Silent             | SNV          | C                | C                 | T                 | TCGA-B0-4833-01              |
| ACLY        | 37         | 17         | 40054059       | 40054059     | +      | Nonsense Mutation  | SNV          | C                | C                 | A                 | TCGA-B0-5702-01A-11D-1534-10 |
| ACLY        | 37         | 17         | 40061042       | 40061042     | +      | Silent             | SNV          | G                | G                 | T                 | TCGA-BP-4968-01A-01D-1462-08 |
| AGRN        | 37         | 1          | 985094         | 985094       | +      | Frame Shift Del    | DEL          | C                | C                 | -                 | TCGA-B0-5110-01              |
| AGRN        | 37         | 1          | 981443         | 981443       | +      | Missense Mutation  | SNV          | C                | C                 | G                 | TCGA-BP-4162-01              |
| AGRN        | 37         | 1          | 970662         | 970662       | +      | Missense Mutation  | SNV          | C                | C                 | A                 | TCGA-BP-4982-01A-01D-1462-08 |
| AGRN        | 37         | 1          | 979247         | 979251       | +      | Frame Shift Del    | DEL          | GCAGG            | GCAGG             | -                 | TCGA-CJ-4902-01A-01D-1429-08 |

|         |    |    |           |           |   |                   |     |   |   |   |                              |
|---------|----|----|-----------|-----------|---|-------------------|-----|---|---|---|------------------------------|
| AGRN    | 37 | 1  | 985343    | 985343    | + | Missense Mutation | SNV | C | C | A | TCGA-CW-6093-01A-11D-1669-08 |
| ALDOA   | 37 | 16 | 30080933  | 30080933  | + | Missense Mutation | SNV | T | T | G | TCGA-B0-4714-01              |
| ALDOA   | 37 | 16 | 30078964  | 30078964  | + | Frame Shift Del   | DEL | C | C | - | TCGA-BP-5004-01A-01D-1462-08 |
| ANGPTL4 | 37 | 19 | 8429515   | 8429515   | + | Missense Mutation | SNV | A | A | T | TCGA-A3-3378-01A-01D-0966-08 |
| ANGPTL4 | 37 | 19 | 8438683   | 8438683   | + | Missense Mutation | SNV | C | C | G | TCGA-B0-4691-01A-01D-1361-10 |
| ANXA2   | 37 | 15 | 60641324  | 60641324  | + | Silent            | SNV | T | T | G | TCGA-B8-5549-01A-01D-1534-10 |
| ANXA4   | 37 | 2  | 70045736  | 70045736  | + | Missense Mutation | SNV | G | G | A | TCGA-A3-3346-01A-01D-0966-08 |
| ANXA4   | 37 | 2  | 70008703  | 70008703  | + | Silent            | SNV | C | C | A | TCGA-CJ-4635-01A-02D-1373-10 |
| ARCN1   | 37 | 11 | 118454621 | 118454621 | + | Missense Mutation | SNV | G | G | T | TCGA-BP-4787-01A-01D-1373-10 |
| ARCN1   | 37 | 11 | 118454666 | 118454666 | + | Missense Mutation | SNV | C | C | T | TCGA-BP-5201-01A-01D-1429-08 |
| ARCN1   | 37 | 11 | 118473069 | 118473069 | + | RNA               | DEL | G | G | - | TCGA-CJ-5678-01A-11D-1534-10 |
| B2M     | 37 | 15 | 45007705  | 45007705  | + | Missense Mutation | SNV | A | A | C | TCGA-B8-4620-01              |
| B2M     | 37 | 15 | 45007701  | 45007701  | + | Frame Shift Del   | DEL | T | T | - | TCGA-B8-4620-01              |
| BGN     | 37 | X  | 152773750 | 152773750 | + | Silent            | SNV | C | C | T | TCGA-DV-5569-01A-01D-1534-10 |
| C3      | 37 | 19 | 6686809   | 6686809   | + | Missense Mutation | SNV | C | C | G | TCGA-B0-5107-01              |
| C3      | 37 | 19 | 6694615   | 6694615   | + | Missense Mutation | SNV | G | G | C | TCGA-B0-5108-01A-01D-1421-08 |
| C3      | 37 | 19 | 6714022   | 6714022   | + | Nonsense Mutation | SNV | C | C | A | TCGA-B0-5696-01A-11D-1534-10 |
| C3      | 37 | 19 | 6681963   | 6681963   | + | Missense Mutation | SNV | A | A | G | TCGA-BP-4998-01A-01D-1462-08 |
| C3      | 37 | 19 | 6702221   | 6702221   | + | Missense Mutation | SNV | A | A | T | TCGA-CJ-4887-01A-01D-1373-10 |
| C3      | 37 | 19 | 6712358   | 6712358   | + | Silent            | SNV | G | G | A | TCGA-CZ-5452-01A-01D-1501-10 |

|        |    |    |           |           |   |                   |     |   |   |   |                              |
|--------|----|----|-----------|-----------|---|-------------------|-----|---|---|---|------------------------------|
| C3     | 37 | 19 | 6697533   | 6697533   | + | Missense Mutation | SNV | C | C | T | TCGA-CZ-5459-01A-01D-1501-10 |
| CANX   | 37 | 5  | 179149818 | 179149818 | + | Missense Mutation | SNV | C | C | A | TCGA-CJ-4920-01A-01D-1429-08 |
| CEBPA  | 37 | 19 | 33792421  | 33792421  | + | Silent            | SNV | G | G | A | TCGA-B0-4714-01              |
| CEBPA  | 37 | 19 | 33792387  | 33792387  | + | Nonsense Mutation | SNV | G | G | A | TCGA-BP-4173-01A-02D-1366-10 |
| CEBPA  | 37 | 19 | 33792412  | 33792412  | + | Silent            | SNV | G | G | T | TCGA-CJ-4889-01A-01D-1373-10 |
| COL1A1 | 37 | 17 | 48272628  | 48272628  | + | Missense Mutation | SNV | C | C | T | TCGA-B0-5088-01A-01D-1462-08 |
| COL1A1 | 37 | 17 | 48266574  | 48266574  | + | Silent            | SNV | A | A | G | TCGA-B0-5692-01A-11D-1534-10 |
| COL1A1 | 37 | 17 | 48267076  | 48267076  | + | Silent            | SNV | A | A | T | TCGA-CJ-4905-01A-02D-1429-08 |
| COL1A2 | 37 | 7  | 94038888  | 94038888  | + | Missense Mutation | SNV | G | G | T | TCGA-B2-3924-01              |
| COL1A2 | 37 | 7  | 94040381  | 94040381  | + | Missense Mutation | SNV | G | G | C | TCGA-BP-4174-01A-02D-1366-10 |
| COL1A2 | 37 | 7  | 94059617  | 94059617  | + | Missense Mutation | SNV | G | G | A | TCGA-BP-4960-01A-01D-1462-08 |
| COL1A2 | 37 | 7  | 94050324  | 94050324  | + | Missense Mutation | SNV | C | C | A | TCGA-CJ-4912-01A-01D-1429-08 |
| COL1A2 | 37 | 7  | 94051214  | 94051214  | + | Missense Mutation | SNV | A | A | G | TCGA-CZ-5456-01A-01D-1501-10 |
| COL4A2 | 37 | 13 | 111156500 | 111156500 | + | Missense Mutation | SNV | C | C | T | TCGA-B0-4691-01A-01D-1361-10 |
| COL4A2 | 37 | 13 | 111102707 | 111102707 | + | Silent            | SNV | C | C | A | TCGA-B0-5085-01A-01D-1462-08 |
| COL4A2 | 37 | 13 | 111125466 | 111125466 | + | Silent            | SNV | T | T | A | TCGA-CW-5585-01A-01D-1534-10 |
| COL4A2 | 37 | 13 | 111144511 | 111144511 | + | Silent            | SNV | T | T | C | TCGA-CZ-5456-01A-01D-1501-10 |
| COL6A2 | 37 | 21 | 47545941  | 47545941  | + | Missense Mutation | SNV | C | C | T | TCGA-B0-5701-01A-11D-1534-10 |
| COL6A2 | 37 | 21 | 47533975  | 47533975  | + | Nonsense Mutation | SNV | C | C | A | TCGA-B4-5377-01A-01D-1501-10 |
| COL6A2 | 37 | 21 | 47542435  | 47542435  | + | Missense Mutation | SNV | G | G | A | TCGA-BP-4998-01A-01D-1462-08 |

|        |    |    |           |           |   |                   |     |   |   |   |                              |
|--------|----|----|-----------|-----------|---|-------------------|-----|---|---|---|------------------------------|
| COL6A2 | 37 | 21 | 47531392  | 47531392  | + | Missense Mutation | SNV | T | T | C | TCGA-BP-5000-01A-01D-1462-08 |
| COL6A2 | 37 | 21 | 47532722  | 47532722  | + | Missense Mutation | SNV | A | A | T | TCGA-CJ-4881-01A-01D-1373-10 |
| EDIL3  | 37 | 5  | 83402558  | 83402558  | + | Missense Mutation | SNV | T | T | C | TCGA-B0-4814-01A-01D-1361-10 |
| EDIL3  | 37 | 5  | 83356228  | 83356228  | + | Missense Mutation | SNV | G | G | A | TCGA-BP-4989-01A-01D-1462-08 |
| EDIL3  | 37 | 5  | 83402565  | 83402565  | + | Nonsense Mutation | SNV | C | C | A | TCGA-CZ-5461-01A-01D-1501-10 |
| EEF1A1 | 37 | 6  | 74227570  | 74227570  | + | Missense Mutation | SNV | A | A | T | TCGA-A3-3387-01A-01D-1534-10 |
| EEF1A1 | 37 | 6  | 74228564  | 74228564  | + | Nonsense Mutation | SNV | C | C | T | TCGA-BP-4759-01              |
| EEF1A1 | 37 | 6  | 74228230  | 74228230  | + | Silent            | SNV | G | G | T | TCGA-CJ-5686-01A-11D-1669-08 |
| FCGR1A | 37 | 1  | 149763191 | 149763191 | + | RNA               | SNV | G | G | A | TCGA-CJ-4643-01A-02D-1386-10 |
| FCGR1A | 37 | 1  | 149763191 | 149763191 | + | RNA               | SNV | G | G | A | TCGA-CJ-5675-01              |
| FCGR1A | 37 | 1  | 149763191 | 149763191 | + | RNA               | SNV | G | G | A | TCGA-CW-5589-01A-01D-1534-10 |
| FN1    | 37 | 2  | 216298131 | 216298131 | + | Missense Mutation | SNV | T | T | G | TCGA-A3-3308-01A-01D-0966-08 |
| FN1    | 37 | 2  | 216274775 | 216274775 | + | Missense Mutation | SNV | G | G | C | TCGA-A3-3358-01A-01D-1534-10 |
| FN1    | 37 | 2  | 216236992 | 216236992 | + | Silent            | SNV | C | C | A | TCGA-A3-3365-01              |
| FN1    | 37 | 2  | 216295547 | 216295547 | + | Silent            | SNV | C | C | T | TCGA-BP-4787-01A-01D-1373-10 |
| FN1    | 37 | 2  | 216262451 | 216262451 | + | Missense Mutation | SNV | T | T | C | TCGA-BP-4989-01A-01D-1462-08 |
| FN1    | 37 | 2  | 216245654 | 216245654 | + | Missense Mutation | SNV | C | C | G | TCGA-BP-5009-01A-01D-1462-08 |
| FSCN1  | 37 | 7  | 5632985   | 5632985   | + | Missense Mutation | SNV | C | C | T | TCGA-BP-4967-01A-01D-1462-08 |
| FSCN1  | 37 | 7  | 5632742   | 5632742   | + | Missense Mutation | SNV | G | G | C | TCGA-BP-5185-01A-01D-1429-08 |
| FSCN1  | 37 | 7  | 5643128   | 5643128   | + | Missense Mutation | SNV | A | A | T | TCGA-CW-5588-01A-01D-1534-10 |

|          |    |    |          |          |   |                   |     |    |    |   |                              |
|----------|----|----|----------|----------|---|-------------------|-----|----|----|---|------------------------------|
| FUS      | 37 | 16 | 31193930 | 31193930 | + | Silent            | SNV | G  | G  | A | TCGA-B2-5641-01A-01D-1534-10 |
| FUS      | 37 | 16 | 31193931 | 31193931 | + | Missense Mutation | SNV | G  | G  | C | TCGA-B2-5641-01A-01D-1534-10 |
| FUS      | 37 | 16 | 31202109 | 31202109 | + | Missense Mutation | SNV | T  | T  | G | TCGA-B8-5553-01A-01D-1534-10 |
| FUS      | 37 | 16 | 31202110 | 31202110 | + | Missense Mutation | SNV | G  | G  | T | TCGA-B8-5553-01A-01D-1534-10 |
| FUS      | 37 | 16 | 31202112 | 31202112 | + | Nonsense Mutation | SNV | A  | A  | T | TCGA-B8-5553-01A-01D-1534-10 |
| FUS      | 37 | 16 | 31202116 | 31202116 | + | Frame Shift Del   | DEL | C  | C  | - | TCGA-B8-5553-01A-01D-1534-10 |
| FUS      | 37 | 16 | 31201624 | 31201624 | + | Silent            | SNV | T  | T  | C | TCGA-EU-5905-01A-11D-1669-08 |
| GAA      | 37 | 17 | 78090863 | 78090863 | + | Missense Mutation | SNV | A  | A  | T | TCGA-BP-5187-01              |
| GAA      | 37 | 17 | 78090845 | 78090845 | + | Silent            | SNV | C  | C  | T | TCGA-CJ-6027-01A-11D-1669-08 |
| GAL3ST1  | 37 | 22 | 30952062 | 30952062 | + | Frame Shift Del   | DEL | C  | C  | - | TCGA-BP-5185-01A-01D-1429-08 |
| GAL3ST1  | 37 | 22 | 30951966 | 30951966 | + | Missense Mutation | SNV | C  | C  | A | TCGA-CW-6087-01A-11D-1669-08 |
| HLA-A    | 37 | 6  | 29910607 | 29910607 | + | Silent            | SNV | G  | G  | C | TCGA-CJ-4640-01A-02D-1386-10 |
| HLA-A    | 37 | 6  | 29912029 | 29912029 | + | Frame Shift Del   | DEL | G  | G  | - | TCGA-CW-6087-01A-11D-1669-08 |
| HLA-C    | 37 | 6  | 31237817 | 31237817 | + | Missense Mutation | SNV | C  | C  | A | TCGA-BP-4759-01              |
| HLA-C    | 37 | 6  | 31237140 | 31237140 | + | Missense Mutation | SNV | A  | A  | T | TCGA-CZ-5469-01A-01D-1501-10 |
| HLA-DOA  | 37 | 6  | 32974563 | 32974563 | + | Missense Mutation | SNV | C  | C  | A | TCGA-BP-4801-01A-02D-1421-08 |
| HLA-DRA  | 37 | 6  | 32410977 | 32410978 | + | Frame Shift Del   | DEL | CT | CT | - | TCGA-BP-5192-01A-01D-1429-08 |
| HLA-DRB1 | 37 | 6  | 32551957 | 32551957 | + | Missense Mutation | SNV | G  | G  | C | TCGA-B0-5701-01A-11D-1534-10 |
| HLA-DRB5 | 37 | 6  | 32497905 | 32497905 | + | Nonsense Mutation | SNV | G  | G  | A | TCGA-BP-4176-01A-02D-1366-10 |
| HLA-DRB5 | 37 | 6  | 32497905 | 32497905 | + | Nonsense Mutation | SNV | G  | G  | A | TCGA-BP-4759-01              |



|        |    |    |           |           |   |                   |     |   |   |   |                              |
|--------|----|----|-----------|-----------|---|-------------------|-----|---|---|---|------------------------------|
| HLA-E  | 37 | 6  | 30457316  | 30457316  | + | Missense Mutation | SNV | A | A | G | TCGA-B0-4842-01A-02D-1421-08 |
| HLA-E  | 37 | 6  | 30457321  | 30457321  | + | Missense Mutation | SNV | A | A | G | TCGA-BP-5187-01              |
| HLA-E  | 37 | 6  | 30459116  | 30459116  | + | Silent            | SNV | T | T | A | TCGA-CJ-5682-01A-11D-1534-10 |
| HMOX1  | 37 | 22 | 35783139  | 35783139  | + | Missense Mutation | SNV | G | G | T | TCGA-BP-5173-01A-01D-1429-08 |
| HMOX1  | 37 | 22 | 35785885  | 35785885  | + | Missense Mutation | SNV | C | C | A | TCGA-CJ-6028-01A-11D-1669-08 |
| IFI27  | 37 | 14 | 94581236  | 94581236  | + | Missense Mutation | SNV | T | T | G | TCGA-BP-4761-01A-01D-1366-10 |
| IFI30  | 37 | 19 | 18286174  | 18286174  | + | Silent            | SNV | G | G | A | TCGA-B0-4710-01              |
| IFI30  | 37 | 19 | 18286140  | 18286140  | + | Missense Mutation | SNV | G | G | C | TCGA-BP-4163-01              |
| IGFBP3 | 37 | 7  | 45957039  | 45957039  | + | Splice Site       | SNV | C | C | G | TCGA-B0-4837-01A-01D-1373-10 |
| ITGB2  | 37 | 21 | 46321408  | 46321408  | + | Missense Mutation | SNV | G | G | A | TCGA-B0-5088-01A-01D-1462-08 |
| KCNMA1 | 37 | 10 | 78647067  | 78647067  | + | Frame Shift Del   | DEL | T | T | - | TCGA-AK-3450-01              |
| KCNMA1 | 37 | 10 | 78669819  | 78669819  | + | Missense Mutation | SNV | C | C | T | TCGA-B0-4813-01A-01D-1361-10 |
| KCNMA1 | 37 | 10 | 78872137  | 78872137  | + | Silent            | SNV | C | C | A | TCGA-B8-4146-01B-11D-1669-08 |
| KCNMA1 | 37 | 10 | 78709126  | 78709126  | + | Splice Site       | SNV | T | T | C | TCGA-CZ-5451-01A-01D-1501-10 |
| KLF7   | 37 | 2  | 207988751 | 207988751 | + | Silent            | SNV | G | G | A | TCGA-B0-4822-01              |
| LAMC1  | 37 | 1  | 183086460 | 183086460 | + | Missense Mutation | SNV | G | G | T | TCGA-B0-5120-01A-01D-1421-08 |
| LAMC1  | 37 | 1  | 183102612 | 183102612 | + | Missense Mutation | SNV | G | G | A | TCGA-B8-4153-01B-11D-1669-08 |
| LAMC1  | 37 | 1  | 183094629 | 183094629 | + | Frame Shift Del   | DEL | C | C | - | TCGA-DV-5565-01A-01D-1534-10 |
| LOX    | 37 | 5  | 121411209 | 121411209 | + | Missense Mutation | SNV | A | A | C | TCGA-BP-4331-01A-01D-1366-10 |
| LOXL2  | 37 | 8  | 23217701  | 23217701  | + | Missense Mutation | SNV | C | C | T | TCGA-B0-5077-01A-01D-1462-08 |
| LOXL2  | 37 | 8  | 23167334  | 23167334  | + | Missense Mutation | SNV | T | T | G | TCGA-BP-4964-01A-01D-1462-08 |

|        |    |    |           |           |   |                   |     |   |   |        |                              |
|--------|----|----|-----------|-----------|---|-------------------|-----|---|---|--------|------------------------------|
| MARCKS | 37 | 6  | 114181301 | 114181302 | + | In Frame Ins      | INS | - | - | TGAGGC | TCGA-A3-3319-01A-01D-0966-08 |
| MARCKS | 37 | 6  | 114178975 | 114178975 | + | Missense Mutation | SNV | G | G | C      | TCGA-B0-5713-01A-11D-1669-08 |
| MARCKS | 37 | 6  | 114181210 | 114181210 | + | Frame Shift Del   | DEL | A | A | -      | TCGA-CZ-5459-01A-01D-1501-10 |
| MARCKS | 37 | 6  | 114181210 | 114181210 | + | Frame Shift Del   | DEL | A | A | -      | TCGA-CZ-5465-01A-01D-1806-10 |
| MET    | 37 | 7  | 116339927 | 116339927 | + | Silent            | SNV | G | G | T      | TCGA-CJ-4916-01A-01D-1429-08 |
| MET    | 37 | 7  | 116415115 | 116415115 | + | Missense Mutation | SNV | T | T | A      | TCGA-CW-6087-01A-11D-1669-08 |
| MET    | 37 | 7  | 116411638 | 116411638 | + | Silent            | SNV | C | C | G      | TCGA-CZ-5465-01A-01D-1806-10 |
| MET    | 37 | 7  | 116380121 | 116380121 | + | Missense Mutation | SNV | G | G | C      | TCGA-EU-5907-01A-11D-1669-08 |
| MVP    | 37 | 16 | 29853112  | 29853112  | + | Missense Mutation | SNV | C | C | A      | TCGA-B0-4842-01A-02D-1421-08 |
| MVP    | 37 | 16 | 29841797  | 29841798  | + | RNA               | INS | - | - | C      | TCGA-B0-5699-01              |
| MVP    | 37 | 16 | 29858602  | 29858602  | + | Missense Mutation | SNV | G | G | A      | TCGA-CJ-5680-01A-11D-1534-10 |
| MVP    | 37 | 16 | 29858549  | 29858549  | + | Missense Mutation | SNV | G | G | A      | TCGA-CZ-4853-01A-01D-1429-08 |
| NDRG1  | 37 | 8  | 134270635 | 134270635 | + | Splice Site       | SNV | C | C | T      | TCGA-B0-4815-01A-01D-1501-10 |
| NDRG1  | 37 | 8  | 134296522 | 134296522 | + | Silent            | SNV | A | A | T      | TCGA-BP-4355-01              |
| NNMT   | 37 | 11 | 114183068 | 114183068 | + | Missense Mutation | SNV | G | G | C      | TCGA-B0-4712-01A-01D-1501-10 |
| P4HA2  | 37 | 5  | 131543565 | 131543565 | + | Nonsense Mutation | SNV | G | G | A      | TCGA-B0-5099-01A-01D-1421-08 |
| PGF    | 37 | 14 | 75416059  | 75416059  | + | Splice Site       | SNV | C | C | T      | TCGA-A3-3367-01A-02D-1421-08 |
| PKM    | 37 | 15 | 72495427  | 72495427  | + | Missense Mutation | SNV | C | C | G      | TCGA-B0-4841-01A-01D-1361-10 |
| PLIN2  | 37 | 9  | 19116637  | 19116637  | + | Missense Mutation | SNV | G | G | A      | TCGA-AK-3458-01A-01D-1501-10 |
| PLOD1  | 37 | 1  | 12010478  | 12010478  | + | Nonsense Mutation | SNV | C | C | T      | TCGA-CJ-4884-01              |

|        |    |    |           |           |   |                   |     |   |   |   |                              |
|--------|----|----|-----------|-----------|---|-------------------|-----|---|---|---|------------------------------|
| PLOD2  | 37 | 3  | 145820619 | 145820619 | + | Missense Mutation | SNV | C | C | G | TCGA-B0-5119-01A-02D-1421-08 |
| PLOD2  | 37 | 3  | 145788846 | 145788846 | + | Missense Mutation | SNV | C | C | T | TCGA-BP-5198-01A-01D-1429-08 |
| PLOD2  | 37 | 3  | 145804638 | 145804638 | + | Missense Mutation | SNV | T | T | C | TCGA-CJ-4887-01A-01D-1373-10 |
| PLOD2  | 37 | 3  | 145799589 | 145799589 | + | Missense Mutation | SNV | A | A | T | TCGA-CJ-6033-01A-11D-1669-08 |
| POSTN  | 37 | 13 | 38137418  | 38137418  | + | RNA               | SNV | T | T | A | TCGA-B0-5104-01              |
| POSTN  | 37 | 13 | 38162097  | 38162097  | + | Silent            | SNV | G | G | A | TCGA-BP-4164-01              |
| POSTN  | 37 | 13 | 38154095  | 38154095  | + | Missense Mutation | SNV | C | C | A | TCGA-BP-5190-01A-01D-1429-08 |
| POSTN  | 37 | 13 | 38143504  | 38143504  | + | Silent            | SNV | G | G | T | TCGA-CJ-4892-01              |
| PTRF   | 37 | 17 | 40556892  | 40556892  | + | Missense Mutation | SNV | C | C | A | TCGA-CZ-5455-01              |
| RB1    | 37 | 13 | 49030485  | 49030485  | + | Missense Mutation | SNV | G | G | A | TCGA-BP-4770-01A-01D-1501-10 |
| RBPMS  | 37 | 8  | 30361883  | 30361883  | + | Silent            | SNV | A | A | G | TCGA-AK-3454-01A-02D-1361-10 |
| RBPMS  | 37 | 8  | 30402150  | 30402150  | + | Silent            | SNV | T | T | C | TCGA-B0-5077-01A-01D-1462-08 |
| RBPMS  | 37 | 8  | 30402171  | 30402171  | + | Missense Mutation | SNV | C | C | G | TCGA-B0-5077-01A-01D-1462-08 |
| RBPMS  | 37 | 8  | 30332299  | 30332299  | + | Missense Mutation | SNV | G | G | T | TCGA-BP-4759-01              |
| RPLP0  | 37 | 12 | 120636946 | 120636946 | + | Missense Mutation | SNV | A | A | C | TCGA-BP-4998-01A-01D-1462-08 |
| RPS11  | 37 | 19 | 50001200  | 50001200  | + | Missense Mutation | SNV | A | A | G | TCGA-B0-5705-01A-11D-1534-10 |
| RPS27A | 37 | 2  | 55462091  | 55462091  | + | Missense Mutation | SNV | A | A | T | TCGA-B0-4844-01A-01D-1361-10 |
| RRAD   | 37 | 16 | 66956063  | 66956063  | + | Missense Mutation | SNV | G | G | T | TCGA-BP-4165-01              |
| RRAD   | 37 | 16 | 66956073  | 66956073  | + | Missense Mutation | SNV | G | G | T | TCGA-CJ-4637-01A-02D-1386-10 |
| RRAD   | 37 | 16 | 66956073  | 66956073  | + | Missense Mutation | SNV | G | G | T | TCGA-CZ-4863-01A-01D-1501-10 |
| SAP30  | 37 | 4  | 174292632 | 174292632 | + | Missense Mutation | SNV | T | T | C | TCGA-B0-4817-01A-01D-1361-10 |

|         |    |    |           |           |   |                   |     |   |   |   |                              |
|---------|----|----|-----------|-----------|---|-------------------|-----|---|---|---|------------------------------|
| SCARB1  | 37 | 12 | 125267275 | 125267275 | + | Missense Mutation | SNV | A | A | G | TCGA-A3-3385-01              |
| SCARB1  | 37 | 12 | 125279747 | 125279747 | + | Missense Mutation | SNV | C | C | A | TCGA-CJ-4881-01A-01D-1373-10 |
| SHMT2   | 37 | 12 | 57627609  | 57627609  | + | Missense Mutation | SNV | G | G | A | TCGA-A3-3308-01A-01D-0966-08 |
| SHMT2   | 37 | 12 | 57625269  | 57625269  | + | Missense Mutation | SNV | C | C | A | TCGA-B0-4817-01A-01D-1361-10 |
| SHMT2   | 37 | 12 | 57626066  | 57626066  | + | Frame Shift Del   | DEL | T | T | - | TCGA-BP-4976-01A-01D-1462-08 |
| SLAMF7  | 37 | 1  | 160719769 | 160719769 | + | Missense Mutation | SNV | A | A | G | TCGA-B0-5095-01A-01D-1421-08 |
| SLAMF7  | 37 | 1  | 160718025 | 160718025 | + | Missense Mutation | SNV | G | G | A | TCGA-BP-4963-01A-01D-1462-08 |
| SLC16A3 | 37 | 17 | 80195666  | 80195666  | + | Missense Mutation | SNV | C | C | A | TCGA-BP-4775-01A-01D-1366-10 |
| SLC16A3 | 37 | 17 | 80194627  | 80194627  | + | Silent            | SNV | G | G | C | TCGA-CZ-5459-01A-01D-1501-10 |
| SLC6A8  | 37 | X  | 152957540 | 152957540 | + | Missense Mutation | SNV | A | A | G | TCGA-B0-4828-01A-01D-1361-10 |
| SLC6A8  | 37 | X  | 152954167 | 152954167 | + | Silent            | SNV | C | C | A | TCGA-B0-5110-01              |
| SLC6A8  | 37 | X  | 152956789 | 152956789 | + | Missense Mutation | SNV | T | T | A | TCGA-B8-4151-01A-01D-1806-10 |
| SPARC   | 37 | 5  | 151049279 | 151049279 | + | Frame Shift Del   | DEL | C | C | - | TCGA-B8-5550-01              |
| STAT6   | 37 | 12 | 57499020  | 57499021  | + | Frame Shift Ins   | INS | - | - | G | TCGA-A3-3323-01A-01D-0966-08 |
| STAT6   | 37 | 12 | 57499020  | 57499021  | + | Frame Shift Ins   | INS | - | - | G | TCGA-B0-5099-01A-01D-1421-08 |
| STAT6   | 37 | 12 | 57493192  | 57493192  | + | Missense Mutation | SNV | G | G | T | TCGA-B8-5163-01A-01D-1421-08 |
| STAT6   | 37 | 12 | 57501489  | 57501489  | + | Missense Mutation | SNV | A | A | C | TCGA-BP-4351-01A-01D-1366-10 |
| STC1    | 37 | 8  | 23702339  | 23702339  | + | Silent            | SNV | G | G | T | TCGA-B0-4839-01A-01D-1373-10 |
| TNS1    | 37 | 2  | 218713396 | 218713396 | + | Missense Mutation | SNV | C | C | G | TCGA-B2-5633-01A-01D-1534-10 |
| TNS1    | 37 | 2  | 218673368 | 218673368 | + | Missense Mutation | SNV | A | A | T | TCGA-BP-4329-01A-02D-1366-10 |

|       |    |    |           |           |   |                   |     |     |     |   |                              |
|-------|----|----|-----------|-----------|---|-------------------|-----|-----|-----|---|------------------------------|
| TNS1  | 37 | 2  | 218686541 | 218686541 | + | Missense Mutation | SNV | A   | A   | G | TCGA-BP-4775-01A-01D-1366-10 |
| TNS1  | 37 | 2  | 218713105 | 218713105 | + | Missense Mutation | SNV | C   | C   | A | TCGA-BP-5004-01A-01D-1462-08 |
| TRIB3 | 37 | 20 | 377225    | 377225    | + | Frame Shift Del   | DEL | C   | C   | - | TCGA-CJ-4636-01              |
| TSC2  | 37 | 16 | 2132493   | 2132493   | + | Missense Mutation | SNV | G   | G   | A | TCGA-A3-3322-01              |
| TSC2  | 37 | 16 | 2112006   | 2112006   | + | Missense Mutation | SNV | G   | G   | T | TCGA-B0-4712-01A-01D-1501-10 |
| TSC2  | 37 | 16 | 2131631   | 2131631   | + | Missense Mutation | SNV | C   | C   | A | TCGA-B0-5709-01A-11D-1534-10 |
| TSC2  | 37 | 16 | 2126068   | 2126068   | + | Splice Site       | SNV | G   | G   | A | TCGA-BP-4801-01A-02D-1421-08 |
| TSC2  | 37 | 16 | 2126070   | 2126070   | + | Missense Mutation | SNV | T   | T   | A | TCGA-BP-4801-01A-02D-1421-08 |
| TSC2  | 37 | 16 | 2134519   | 2134519   | + | Silent            | SNV | C   | C   | G | TCGA-CZ-4859-01A-02D-1429-08 |
| UBC   | 37 | 12 | 125397153 | 125397153 | + | Missense Mutation | SNV | T   | T   | C | TCGA-A3-3387-01A-01D-1534-10 |
| UBC   | 37 | 12 | 125397187 | 125397187 | + | Silent            | SNV | G   | G   | A | TCGA-AS-3778-01A-01D-0966-08 |
| UBC   | 37 | 12 | 125398050 | 125398052 | + | In_Frame Del      | DEL | TGA | TGA | - | TCGA-B0-5710-01A-11D-1669-08 |
| VCAM1 | 37 | 1  | 101200121 | 101200121 | + | Missense Mutation | SNV | T   | T   | G | TCGA-B0-5102-01A-01D-1421-08 |
| VEGFA | 37 | 6  | 43742101  | 43742101  | + | Silent            | SNV | A   | A   | G | TCGA-B0-4818-01A-01D-1501-10 |

**Tab. S8: Shared somatic variants in the TCGA patient cohort.**

| <b>Gene</b> | <b>Number of shared variants</b> | <b>Variant</b> | <b>Patients</b>                        | <b>Number of patients</b> |
|-------------|----------------------------------|----------------|----------------------------------------|---------------------------|
| STAT6       | 1                                | 57499020       | TCGA-A3-3323,TCGA-B0-5099              | 2                         |
| MARCKS      | 1                                | 114181210      | TCGA-CZ-5459,TCGA-CZ-5465              | 2                         |
| RRAD        | 1                                | 66956073       | TCGA-CJ-4637,TCGA-CZ-4863              | 2                         |
| FCGR1A      | 1                                | 149763191      | TCGA-CJ-4643,TCGA-CJ-5675,TCGA-CW-5589 | 3                         |
| HLA-DRB5    | 1                                | 32497905       | TCGA-BP-4176,TCGA-BP-4759              | 2                         |

Tab. S9: Coding variants in the candidate genes TSC2, RB1, and MET in patient cohort 1.

| Gene    | Chr        | Coordinate | Variant          | Type     | Median alt. variant freq. (range) | Number of samples (percent) | Protein pos. | Amino acid subst.      | Codon   | rs number   |
|---------|------------|------------|------------------|----------|-----------------------------------|-----------------------------|--------------|------------------------|---------|-------------|
| TSC2    | 16         | 2103409    | C>C/T            | snv      | 2                                 | 1 (1.9)                     | 98           | R/W                    | Cgg/Tgg | rs372321790 |
|         |            | 2104327    | T>T/A            | snv      | 7.3                               | 1 (1.9)                     | 123          | F/I                    | Ttc/Atc |             |
|         |            | 2104344    | G>G/T            | snv      | 3.4                               | 1 (1.9)                     | 128          | K/N                    | aaG/aaT | rs748095129 |
|         |            | 2104408    | G>G/T            | snv      | 4.9                               | 1 (1.9)                     | 150          | G/W                    | Ggg/Tgg |             |
|         |            | 2105442    | C>C/T            | snv      | 48.4                              | 1 (1.9)                     | 174          | S/L                    | tCg/tTg | rs747538587 |
|         |            | 2106729    | CG>CG/C          | del      | 6.7                               | 1 (1.9)                     | 245          | R/X                    | cGc/cc  |             |
|         |            | 2106733    | C>C/T            | snv      | 12.8                              | 1 (1.9)                     | 246          | T/I                    | aCc/aTc |             |
|         |            | 2106745    | A>A/T            | snv      | 5.1                               | 1 (1.9)                     | 250          | K/M                    | aAg/aTg |             |
|         |            | 2106757    | A>A/T            | snv      | 4.1                               | 1 (1.9)                     | 254          | E/V                    | gAg/gTg |             |
|         |            | 2107149    | T>T/C            | snv      | 2.5                               | 1 (1.9)                     | 273          | I/T                    | aTc/aCc |             |
|         |            | 2110795    | G>G/A            | snv      | 46.9 (44.3-49.4)                  | 2 (3.8)                     | 367          | R/Q                    | cGg/cAg | rs1800725   |
|         |            | 2121512    | C>C/A            | snv      | 4.7                               | 1 (1.9)                     | 614          | A/D                    | gCc/gAc | rs45454398  |
|         |            | 2121614    | A>A/T            | snv      | 8.7                               | 1 (1.9)                     | 648          | Y/F                    | tAc/tTc |             |
|         |            | 2122248    | G>G/T            | snv      | 2.7                               | 1 (1.9)                     | 702          | D/Y                    | Gac/Tac |             |
|         |            | 2125856    | G>G/T            | snv      | 7.5                               | 1 (1.9)                     | 868          | V/L                    | Gtg/Ttg |             |
|         |            | 2126540    | G>G/T            | snv      | 2.5                               | 1 (1.9)                     | 931          | D/Y                    | Gac/Tac |             |
|         |            | 2129181    | A>A/G            | snv      | 10.2                              | 1 (1.9)                     | 1039         | T/A                    | Acg/Gcg |             |
|         |            | 2130243    | CG>CG/C          | del      | 3.4                               | 1 (1.9)                     | 1159         | R/X                    | cGg/cg  |             |
|         |            | 2130250    | C>C/T            | snv      | 2.6                               | 1 (1.9)                     | 1161         | A/V                    | gCa/gTa | rs397514901 |
|         |            | 2131791    | C>C/A            | snv      | 2.1                               | 1 (1.9)                     | 1269         | S/Y                    | tCc/tAc |             |
|         |            | 2132438    | G>G/T            | snv      | 3.1                               | 1 (1.9)                     | 1272         | V                      | gtG/gtT |             |
|         |            | 2134229    | T>T/G            | snv      | 2.6                               | 1 (1.9)                     | 1336         | S/A                    | Tcg/Gcg |             |
|         |            | 2134248    | A>A/T            | snv      | 2.8                               | 1 (1.9)                     | 1342         | Q/L                    | cAg/cTg |             |
|         |            | 2134377    | C>C/A            | snv      | 3.9                               | 1 (1.9)                     | 1385         | S/Y                    | tCc/tAc |             |
|         |            | 2134432    | C>C/CA           | ins      | 4.9                               | 1 (1.9)                     | 0            | -/X                    | -/A     |             |
|         |            | 2134442    | G>G/A            | snv      | 3.5                               | 1 (1.9)                     | 1407         | V/M                    | Gtg/Atg | rs45517332  |
|         |            | 2134569    | C>C/T            | snv      | 5.2                               | 1 (1.9)                     | 1449         | S/F                    | tCc/tTc | rs759004251 |
|         |            | 2134581    | C>C/T            | snv      | 6.5                               | 1 (1.9)                     | 1453         | P/L                    | cCc/cTc | rs748182471 |
|         |            | 2134616    | G>G/T            | snv      | 4.1                               | 1 (1.9)                     | 1465         | D/Y                    | Gac/Tac |             |
|         |            | 2135288    | C>C/T            | snv      | 2.5                               | 1 (1.9)                     | 1543         | H/Y                    | Cac/Tac |             |
| 2135300 | G>G/T      | snv        | 3.1              | 1 (1.9)  | 1547                              | V/F                         | Gtc/Ttc      |                        |         |             |
| 2136332 | G>G/A      | snv        | 2.3              | 1 (1.9)  | 1601                              | G/S                         | Ggt/Agt      |                        |         |             |
| 2136837 | G>G/T      | snv        | 3.1              | 1 (1.9)  | 1652                              | D/Y                         | Gac/Tac      |                        |         |             |
| 2138508 | G>G/C      | snv        | 47.3             | 1 (1.9)  | 1774                              | S/T                         | aGc/aCc      | rs9209                 |         |             |
| 2138662 | G>G/T      | snv        | 2.6              | 1 (1.9)  | 3' UTR                            |                             |              |                        |         |             |
| 2138670 | TAA>TA A/T | del        | 49.5 (35.2-97.5) | 6 (11.3) | 3' UTR                            |                             |              | rs36032671; rs71744655 |         |             |
| RB1     | 13         | 49027168   | C>C/T            | snv      | 3.5                               | 1 (1.9)                     | 579          | R/*                    | Cga/Tga | rs121913305 |
| MET     | 7          | 116340086  | A>A/G            | snv      | 65.9                              | 1 (1.9)                     | 316          | I/M                    | atA/atG | rs35225896  |
|         |            | 116340156  | G>G/T            | snv      | 5.3                               | 1 (1.9)                     | 340          | D/Y                    | Gac/Tac |             |
|         |            | 116340209  | G>G/T            | snv      | 3.8                               | 1 (1.9)                     | 357          | M/I                    | atG/atT |             |

|  |           |       |     |                  |         |      |     |         |             |
|--|-----------|-------|-----|------------------|---------|------|-----|---------|-------------|
|  | 116340262 | A>A/G | snv | 50.4 (41.3-53.9) | 3 (5.7) | 375  | N/S | aAc/aGc | rs33917957  |
|  | 116340266 | G>G/T | snv | 2.9              | 1 (1.9) | 376  | K/N | aaG/aaT |             |
|  | 116371891 | C>C/A | snv | 2.5              | 1 (1.9) | 457  | T/K | aCa/aAa |             |
|  | 116399419 | G>G/T | snv | 2.2              | 1 (1.9) | 765  | V/F | Gtc/Ttc |             |
|  | 116411923 | C>C/T | snv | 50.7 (48.0-53.4) | 2 (3.8) | 988  | R/C | Cgc/Tgc | rs34589476  |
|  | 116411990 | C>C/T | snv | 37.7 (36.1-39.3) | 2 (3.8) | 1010 | T/I | aCt/aTt | rs56391007  |
|  | 116414949 | T>T/G | snv | 25.6             | 1 (1.9) | 1033 | S/A | Tca/Gca | rs539345989 |



**Tab. S10: Overview of candidate genes.**

Gene expression is given in log<sub>2</sub> FPKM-UQ.

| Entrez ID | Gene Symbol | Median expr. tumor | Median expr. normal | FC tumor/normal [log <sub>2</sub> ] | p-value tumor/normal (Wilcoxon rank-sum) | FC paired tumor/normal [log <sub>2</sub> ] | p-value paired tumor/normal (Wilcoxon signed-rank) | CV [%] | Somatic mut. (TCGA) | MHC class I peptides | MHC class II peptides | Nr. of patients with class I peptide | Nr. of patients with class II peptide | Immuno genic peptides | Patients with variants (cohort 1) | Number diff. variants (cohort 1) |
|-----------|-------------|--------------------|---------------------|-------------------------------------|------------------------------------------|--------------------------------------------|----------------------------------------------------|--------|---------------------|----------------------|-----------------------|--------------------------------------|---------------------------------------|-----------------------|-----------------------------------|----------------------------------|
| 19        | ABCA1       | 17.85              | 16.19               | 1.67                                | 8.90E-36                                 | 1.66                                       | 1.31E-12                                           | 4.02   | 8                   | 1                    | 0                     | 3                                    | 0                                     |                       |                                   |                                  |
| 25890     | ABI3BP      | 17.30              | 16.65               | 0.65                                | 2.75E-05                                 | 0.61                                       | 7.52E-04                                           | 7.75   | 1                   | 1                    | 0                     | 3                                    | 0                                     |                       |                                   |                                  |
| 47        | ACLY        | 20.99              | 19.46               | 1.53                                | 2.26E-37                                 | 1.61                                       | 1.15E-12                                           | 2.53   | 5                   | 1                    | 0                     | 3                                    | 0                                     |                       |                                   |                                  |
| 60        | ACTB        | 24.70              | 24.21               | 0.48                                | 5.87E-10                                 | 0.31                                       | 8.80E-04                                           | 2.04   | 0                   | 0                    | 1                     | 0                                    | 3                                     |                       |                                   |                                  |
| 133       | ADM         | 20.76              | 17.61               | 3.16                                | 1.04E-37                                 | 2.89                                       | 4.19E-12                                           | 4.10   | 0                   | 1                    | 0                     | 3                                    | 0                                     |                       |                                   |                                  |
| 375790    | AGRN        | 20.07              | 19.86               | 0.22                                | 3.86E-05                                 | 0.18                                       | 7.16E-03                                           | 3.13   | 5                   | 2                    | 3                     | 9                                    | 11                                    |                       |                                   |                                  |
| 226       | ALDOA       | 22.87              | 21.66               | 1.22                                | 7.84E-33                                 | 1.30                                       | 3.20E-11                                           | 2.52   | 2                   | 4                    | 0                     | 15                                   | 0                                     |                       |                                   |                                  |
| 230       | ALDOC       | 19.54              | 16.57               | 2.97                                | 9.77E-30                                 | 2.41                                       | 3.10E-10                                           | 6.57   | 0                   | 2                    | 0                     | 7                                    | 0                                     |                       |                                   |                                  |
| 51129     | ANGPTL4     | 22.87              | 16.56               | 6.31                                | 1.53E-39                                 | 6.10                                       | 1.15E-12                                           | 4.33   | 2                   | 2                    | 0                     | 5                                    | 0                                     | 2                     |                                   |                                  |
| 302       | ANXA2       | 20.18              | 19.48               | 0.70                                | 6.06E-15                                 | 0.90                                       | 1.63E-09                                           | 3.35   | 1                   | 1                    | 2                     | 5                                    | 7                                     |                       |                                   |                                  |
| 307       | ANXA4       | 20.76              | 18.85               | 1.91                                | 2.74E-38                                 | 2.20                                       | 1.20E-12                                           | 3.30   | 2                   | 0                    | 2                     | 0                                    | 10                                    |                       |                                   |                                  |
| 308       | ANXA5       | 21.62              | 21.11               | 0.51                                | 1.07E-18                                 | 0.63                                       | 1.08E-10                                           | 1.81   | 0                   | 0                    | 1                     | 0                                    | 3                                     |                       |                                   |                                  |
| 372       | ARCN1       | 19.99              | 19.89               | 0.09                                | 2.67E-03                                 | 0.20                                       | 1.23E-06                                           | 1.71   | 3                   | 1                    | 0                     | 6                                    | 0                                     |                       |                                   |                                  |
| 567       | B2M         | 24.56              | 23.01               | 1.55                                | 1.26E-33                                 | 1.45                                       | 2.25E-12                                           | 2.44   | 1                   | 0                    | 1                     | 0                                    | 3                                     |                       |                                   |                                  |
| 633       | BGN         | 23.11              | 21.88               | 1.23                                | 2.49E-16                                 | 0.56                                       | 3.74E-04                                           | 5.19   | 1                   | 0                    | 1                     | 0                                    | 5                                     |                       |                                   |                                  |
| 664       | BNIP3       | 20.32              | 18.65               | 1.67                                | 7.86E-35                                 | 1.68                                       | 2.69E-12                                           | 3.66   | 0                   | 1                    | 0                     | 3                                    | 0                                     |                       |                                   |                                  |
| 689       | BTF3        | 21.70              | 21.18               | 0.52                                | 1.25E-23                                 | 0.58                                       | 2.18E-11                                           | 2.05   | 0                   | 1                    | 0                     | 3                                    | 0                                     |                       |                                   |                                  |
| 718       | C3          | 21.94              | 16.57               | 5.37                                | 4.38E-35                                 | 5.11                                       | 1.44E-12                                           | 6.51   | 7                   | 6                    | 3                     | 18                                   | 10                                    |                       |                                   |                                  |
| 821       | CANX        | 22.16              | 21.60               | 0.56                                | 2.82E-15                                 | 0.79                                       | 5.70E-12                                           | 2.62   | 1                   | 0                    | 2                     | 0                                    | 8                                     |                       |                                   |                                  |
| 284119    | CAVIN1      | 21.35              | 20.40               | 0.96                                | 6.31E-25                                 | 0.87                                       | 7.46E-10                                           | 2.74   | 1                   | 1                    | 0                     | 3                                    | 0                                     |                       |                                   |                                  |
| 595       | CCND1       | 21.94              | 19.62               | 2.32                                | 1.18E-37                                 | 2.29                                       | 1.15E-12                                           | 3.92   | 0                   | 2                    | 0                     | 11                                   | 0                                     |                       |                                   |                                  |
| 1050      | CEBPA       | 16.28              | 15.04               | 1.24                                | 6.68E-22                                 | 1.61                                       | 4.63E-10                                           | 6.60   | 3                   | 1                    | 0                     | 3                                    | 0                                     |                       |                                   |                                  |
| 1277      | COL1A1      | 20.44              | 17.24               | 3.20                                | 3.96E-24                                 | 2.47                                       | 7.17E-10                                           | 8.36   | 3                   | 1                    | 0                     | 3                                    | 0                                     |                       |                                   |                                  |
| 1278      | COL1A2      | 20.22              | 18.32               | 1.90                                | 1.19E-17                                 | 1.52                                       | 3.79E-08                                           | 6.73   | 5                   | 0                    | 1                     | 0                                    | 4                                     |                       |                                   |                                  |
| 1284      | COL4A2      | 21.62              | 19.85               | 1.77                                | 5.10E-31                                 | 1.66                                       | 1.30E-11                                           | 3.77   | 4                   | 1                    | 2                     | 4                                    | 4                                     |                       |                                   |                                  |
| 1292      | COL6A2      | 20.75              | 18.51               | 2.23                                | 4.47E-31                                 | 1.74                                       | 2.54E-10                                           | 5.00   | 5                   | 1                    | 1                     | 3                                    | 3                                     |                       |                                   |                                  |
| 1509      | CTSD        | 23.18              | 22.91               | 0.27                                | 1.21E-03                                 | 0.35                                       | 1.72E-04                                           | 3.47   | 0                   | 1                    | 4                     | 6                                    | 9                                     |                       |                                   |                                  |
| 54541     | DDIT4       | 21.56              | 19.00               | 2.56                                | 8.34E-34                                 | 2.23                                       | 1.97E-12                                           | 4.12   | 0                   | 1                    | 0                     | 3                                    | 0                                     |                       |                                   |                                  |

|        |          |       |       |      |          |      |          |      |   |   |   |    |    |   |  |  |
|--------|----------|-------|-------|------|----------|------|----------|------|---|---|---|----|----|---|--|--|
| 10085  | EDIL3    | 18.63 | 17.60 | 1.03 | 4.95E-12 | 1.18 | 9.26E-07 | 6.84 | 3 | 0 | 2 | 0  | 4  |   |  |  |
| 1915   | EEF1A1   | 24.63 | 24.41 | 0.23 | 1.61E-02 | 0.22 | 2.74E-03 | 2.38 | 3 | 0 | 4 | 0  | 5  |   |  |  |
| 112399 | EGLN3    | 20.85 | 16.17 | 4.68 | 1.51E-39 | 4.43 | 1.20E-12 | 3.45 | 0 | 4 | 0 | 19 | 0  | 5 |  |  |
| 1975   | EIF4B    | 20.93 | 20.60 | 0.32 | 2.28E-07 | 0.44 | 2.60E-07 | 2.81 | 0 | 1 | 0 | 3  | 0  |   |  |  |
| 2209   | FCGR1A   | 15.81 | 12.46 | 3.35 | 6.62E-37 | 3.47 | 1.15E-12 | 7.23 | 3 | 0 | 2 | 0  | 4  |   |  |  |
| 2335   | FN1      | 20.87 | 19.14 | 1.73 | 4.95E-26 | 2.03 | 7.10E-12 | 5.54 | 6 | 0 | 8 | 0  | 17 |   |  |  |
| 6624   | FSCN1    | 19.14 | 17.66 | 1.47 | 3.74E-30 | 1.27 | 1.27E-10 | 4.77 | 3 | 1 | 0 | 3  | 0  |   |  |  |
| 2521   | FUS      | 19.30 | 18.79 | 0.51 | 1.30E-15 | 0.32 | 6.51E-07 | 2.29 | 3 | 1 | 0 | 3  | 0  |   |  |  |
| 2548   | GAA      | 19.49 | 19.21 | 0.28 | 5.51E-07 | 0.37 | 4.13E-07 | 3.14 | 2 | 0 | 1 | 0  | 4  |   |  |  |
| 9514   | GAL3ST1  | 20.21 | 17.19 | 3.02 | 3.10E-38 | 3.17 | 1.80E-12 | 5.30 | 2 | 1 | 0 | 3  | 0  |   |  |  |
| 2597   | GAPDH    | 24.94 | 23.45 | 1.49 | 1.15E-37 | 1.59 | 2.25E-12 | 2.69 | 0 | 0 | 1 | 0  | 3  |   |  |  |
| 2745   | GLRX     | 18.53 | 17.94 | 0.59 | 1.12E-05 | 0.55 | 1.55E-04 | 4.16 | 0 | 0 | 1 | 0  | 3  |   |  |  |
| 3105   | HLA-A    | 24.18 | 22.41 | 1.77 | 6.12E-38 | 1.86 | 1.25E-12 | 2.60 | 2 | 0 | 1 | 0  | 3  |   |  |  |
| 3106   | HLA-B    | 24.60 | 22.39 | 2.21 | 3.10E-38 | 2.14 | 1.20E-12 | 2.54 | 0 | 1 | 2 | 3  | 8  |   |  |  |
| 3107   | HLA-C    | 23.85 | 22.49 | 1.35 | 1.49E-34 | 1.47 | 1.44E-12 | 2.56 | 2 | 0 | 1 | 0  | 5  |   |  |  |
| 3108   | HLA-DMA  | 20.35 | 18.86 | 1.49 | 4.10E-35 | 1.55 | 1.64E-12 | 3.48 | 0 | 1 | 0 | 3  | 0  |   |  |  |
| 3111   | HLA-DOA  | 18.71 | 17.52 | 1.19 | 7.01E-19 | 1.55 | 9.90E-11 | 6.03 | 1 | 1 | 0 | 4  | 0  |   |  |  |
| 3122   | HLA-DRA  | 24.59 | 22.75 | 1.83 | 1.83E-32 | 2.02 | 1.57E-12 | 3.53 | 1 | 0 | 1 | 0  | 3  |   |  |  |
| 3123   | HLA-DRB1 | 23.74 | 22.09 | 1.65 | 1.52E-32 | 1.84 | 1.31E-12 | 3.36 | 1 | 0 | 2 | 0  | 4  |   |  |  |
| 3127   | HLA-DRB5 | 21.94 | 20.53 | 1.41 | 1.14E-18 | 1.74 | 2.25E-12 | 4.84 | 2 | 0 | 1 | 0  | 4  |   |  |  |
| 3133   | HLA-E    | 23.50 | 22.31 | 1.19 | 3.69E-36 | 1.24 | 1.31E-12 | 1.91 | 3 | 0 | 1 | 0  | 5  |   |  |  |
| 3162   | HMOX1    | 21.44 | 19.02 | 2.42 | 2.21E-37 | 3.11 | 1.44E-12 | 3.73 | 2 | 2 | 0 | 8  | 0  |   |  |  |
| 3178   | HNRNPA1  | 21.32 | 20.88 | 0.44 | 2.75E-22 | 0.43 | 1.15E-09 | 1.71 | 0 | 1 | 0 | 3  | 0  |   |  |  |
| 26353  | HSPB8    | 20.86 | 18.50 | 2.36 | 9.77E-37 | 2.79 | 1.15E-12 | 3.51 | 0 | 1 | 0 | 3  | 0  |   |  |  |
| 5654   | HTRA1    | 21.40 | 20.67 | 0.73 | 7.14E-12 | 0.96 | 2.51E-07 | 3.81 | 0 | 1 | 1 | 4  | 4  |   |  |  |
| 3429   | IFI27    | 19.24 | 17.92 | 1.33 | 2.45E-23 | 1.39 | 1.69E-10 | 5.39 | 1 | 1 | 0 | 3  | 0  |   |  |  |
| 10437  | IFI30    | 13.92 | 12.01 | 1.90 | 2.21E-27 | 1.31 | 1.91E-10 | 9.65 | 2 | 0 | 1 | 0  | 5  |   |  |  |
| 3486   | IGFBP3   | 23.50 | 19.53 | 3.98 | 4.83E-39 | 3.74 | 1.25E-12 | 4.31 | 1 | 1 | 6 | 3  | 8  |   |  |  |
| 3689   | ITGB2    | 18.96 | 16.21 | 2.75 | 1.36E-37 | 2.82 | 1.80E-12 | 4.24 | 1 | 0 | 1 | 0  | 3  |   |  |  |
| 3778   | KCNMA1   | 16.06 | 13.26 | 2.80 | 4.71E-28 | 2.52 | 9.12E-11 | 8.47 | 4 | 1 | 0 | 3  | 0  |   |  |  |
| 8609   | KLF7     | 17.20 | 16.65 | 0.55 | 4.11E-12 | 0.55 | 5.72E-07 | 3.75 | 1 | 1 | 0 | 3  | 0  |   |  |  |
| 3875   | KRT18    | 21.30 | 20.57 | 0.73 | 1.41E-11 | 0.79 | 4.71E-07 | 4.07 | 0 | 8 | 0 | 17 | 0  |   |  |  |
| 3856   | KRT8     | 20.85 | 20.35 | 0.50 | 6.08E-05 | 0.47 | 3.74E-04 | 4.25 | 0 | 2 | 0 | 7  | 0  |   |  |  |
| 3915   | LAMC1    | 19.86 | 19.16 | 0.70 | 1.55E-15 | 0.84 | 4.45E-10 | 3.06 | 3 | 0 | 1 | 0  | 3  |   |  |  |
| 3959   | LGALS3BP | 21.47 | 21.25 | 0.22 | 2.43E-03 | 0.49 | 1.09E-04 | 4.31 | 0 | 0 | 1 | 0  | 5  |   |  |  |
| 4015   | LOX      | 19.89 | 16.23 | 3.66 | 2.80E-35 | 4.23 | 1.80E-12 | 8.15 | 1 | 1 | 0 | 3  | 0  |   |  |  |
| 4017   | LOXL2    | 18.56 | 15.35 | 3.21 | 1.41E-35 | 3.20 | 2.25E-12 | 5.65 | 2 | 1 | 0 | 3  | 0  |   |  |  |

|       |         |       |       |      |          |      |          |      |   |    |   |    |   |   |    |    |
|-------|---------|-------|-------|------|----------|------|----------|------|---|----|---|----|---|---|----|----|
| 4082  | MARCKS  | 20.09 | 18.93 | 1.16 | 4.13E-30 | 1.24 | 1.62E-11 | 2.89 | 4 | 0  | 1 | 0  | 3 |   |    |    |
| 4233  | MET     | 19.82 | 18.69 | 1.13 | 4.07E-26 | 1.48 | 1.97E-12 | 3.78 | 4 | 1  | 0 | 4  | 0 |   | 13 | 10 |
| 9961  | MVP     | 20.40 | 19.62 | 0.78 | 6.25E-25 | 1.01 | 4.49E-11 | 2.62 | 4 | 1  | 0 | 3  | 0 |   |    |    |
| 10135 | NAMPT   | 18.05 | 17.72 | 0.33 | 7.33E-05 | 0.45 | 9.58E-05 | 4.32 | 0 | 1  | 0 | 4  | 0 |   |    |    |
| 10397 | NDRG1   | 22.45 | 21.04 | 1.40 | 3.27E-33 | 1.51 | 3.07E-11 | 3.13 | 2 | 3  | 0 | 10 | 0 |   |    |    |
| 4837  | NNMT    | 22.40 | 17.23 | 5.17 | 5.99E-38 | 4.93 | 1.15E-12 | 5.24 | 1 | 3  | 0 | 10 | 0 | 2 |    |    |
| 4869  | NPM1    | 21.90 | 20.98 | 0.92 | 5.65E-31 | 0.96 | 3.51E-12 | 2.59 | 0 | 0  | 1 | 0  | 5 |   |    |    |
| 8974  | P4HA2   | 18.31 | 16.57 | 1.74 | 3.70E-28 | 1.75 | 2.09E-11 | 4.03 | 1 | 1  | 0 | 5  | 0 | 0 |    |    |
| 5036  | PA2G4   | 19.42 | 18.99 | 0.43 | 1.08E-23 | 0.44 | 2.09E-11 | 1.90 | 0 | 1  | 0 | 3  | 0 |   |    |    |
| 5066  | PAM     | 19.80 | 19.33 | 0.46 | 9.75E-15 | 0.63 | 1.17E-10 | 2.66 | 0 | 1  | 0 | 3  | 0 |   |    |    |
| 8682  | PEA15   | 21.18 | 20.47 | 0.72 | 8.83E-27 | 0.73 | 1.30E-11 | 1.93 | 0 | 0  | 1 | 0  | 3 |   |    |    |
| 5214  | PFKP    | 21.35 | 18.98 | 2.38 | 1.44E-37 | 2.25 | 2.15E-12 | 2.60 | 0 | 2  | 0 | 7  | 0 | 0 |    |    |
| 5228  | PGF     | 18.43 | 14.36 | 4.07 | 4.72E-38 | 3.84 | 1.15E-12 | 9.51 | 1 | 1  | 0 | 5  | 0 |   |    |    |
| 5315  | PKM     | 22.47 | 21.59 | 0.88 | 1.80E-13 | 0.89 | 1.29E-08 | 2.21 | 1 | 2  | 0 | 6  | 0 |   |    |    |
| 123   | PLIN2   | 22.15 | 18.57 | 3.58 | 7.82E-37 | 3.17 | 2.69E-12 | 4.84 | 1 | 12 | 1 | 27 | 3 |   |    |    |
| 5351  | PLOD1   | 20.20 | 18.81 | 1.39 | 1.03E-35 | 1.52 | 7.74E-12 | 3.41 | 1 | 1  | 0 | 3  | 0 |   |    |    |
| 5352  | PLOD2   | 19.58 | 18.04 | 1.54 | 6.42E-32 | 1.92 | 2.46E-12 | 4.99 | 4 | 2  | 0 | 8  | 0 |   |    |    |
| 10631 | POSTN   | 18.28 | 16.89 | 1.39 | 2.35E-13 | 2.11 | 6.02E-06 | 8.56 | 4 | 0  | 1 | 0  | 4 |   |    |    |
| 5925  | RB1     | 18.63 | 18.16 | 0.46 | 8.69E-13 | 0.56 | 2.79E-09 | 2.62 | 1 | 1  | 0 | 3  | 0 |   | 1  | 1  |
| 11030 | RBPMS   | 18.80 | 18.43 | 0.37 | 9.23E-09 | 0.15 | 2.51E-02 | 3.00 | 3 | 1  | 0 | 3  | 0 |   |    |    |
| 6175  | RPLP0   | 22.79 | 21.76 | 1.04 | 1.54E-30 | 1.07 | 2.18E-11 | 2.85 | 1 | 1  | 0 | 3  | 0 |   |    |    |
| 6205  | RPS11   | 24.10 | 23.24 | 0.85 | 1.01E-27 | 0.79 | 5.77E-11 | 2.40 | 1 | 0  | 1 | 0  | 3 |   |    |    |
| 6223  | RPS19   | 21.96 | 20.55 | 1.42 | 1.53E-34 | 1.37 | 2.00E-11 | 3.56 | 0 | 1  | 0 | 3  | 0 |   |    |    |
| 6224  | RPS20   | 22.43 | 21.44 | 0.99 | 4.87E-27 | 0.89 | 1.42E-11 | 3.28 | 0 | 0  | 1 | 0  | 3 |   |    |    |
| 6233  | RPS27A  | 21.68 | 21.16 | 0.52 | 1.86E-21 | 0.57 | 2.82E-11 | 2.15 | 1 | 0  | 1 | 0  | 3 |   |    |    |
| 6236  | RRAD    | 19.32 | 17.50 | 1.82 | 3.06E-20 | 1.35 | 6.66E-08 | 7.01 | 3 | 2  | 0 | 9  | 0 |   |    |    |
| 10670 | RRAGA   | 20.70 | 20.44 | 0.25 | 9.87E-09 | 0.25 | 1.12E-04 | 2.11 | 0 | 1  | 0 | 6  | 0 |   |    |    |
| 8819  | SAP30   | 18.38 | 15.73 | 2.66 | 8.97E-40 | 2.69 | 1.15E-12 | 2.82 | 1 | 1  | 0 | 5  | 0 |   |    |    |
| 949   | SCARB1  | 19.56 | 15.18 | 4.38 | 6.95E-40 | 4.25 | 1.15E-12 | 4.96 | 2 | 1  | 0 | 3  | 0 |   |    |    |
| 6319  | SCD     | 20.87 | 17.14 | 3.73 | 7.85E-38 | 3.73 | 1.15E-12 | 4.34 | 0 | 2  | 0 | 7  | 0 |   |    |    |
| 6472  | SHMT2   | 20.08 | 17.92 | 2.16 | 2.69E-39 | 2.28 | 1.15E-12 | 2.93 | 3 | 1  | 0 | 3  | 0 |   |    |    |
| 57823 | SLAMF7  | 16.07 | 13.11 | 2.96 | 2.74E-32 | 3.23 | 5.22E-12 | 7.93 | 2 | 0  | 3 | 0  | 6 |   |    |    |
| 9123  | SLC16A3 | 19.48 | 15.97 | 3.51 | 1.79E-39 | 3.48 | 1.64E-12 | 3.64 | 2 | 2  | 0 | 5  | 0 |   |    |    |
| 6535  | SLC6A8  | 20.63 | 19.06 | 1.57 | 2.48E-26 | 1.73 | 1.38E-10 | 5.45 | 3 | 1  | 0 | 7  | 0 |   |    |    |
| 6629  | SNRPB2  | 18.71 | 18.55 | 0.17 | 5.80E-06 | 0.26 | 2.45E-05 | 1.96 | 0 | 1  | 0 | 3  | 0 |   |    |    |
| 6678  | SPARC   | 23.62 | 21.50 | 2.12 | 6.00E-35 | 2.06 | 1.31E-12 | 3.10 | 1 | 0  | 1 | 0  | 3 |   |    |    |
| 6778  | STAT6   | 19.75 | 19.19 | 0.57 | 1.64E-26 | 0.45 | 9.82E-10 | 1.84 | 4 | 1  | 0 | 3  | 0 |   |    |    |
| 8987  | STBD1   | 14.86 | 13.79 | 1.07 | 3.66E-27 | 1.29 | 1.25E-12 | 4.33 | 0 | 1  | 0 | 3  | 0 |   |    |    |
| 6781  | STC1    | 20.17 | 19.69 | 0.48 | 9.22E-04 | 0.38 | 3.34E-02 | 5.11 | 1 | 1  | 0 | 3  | 0 |   |    |    |

|       |       |       |       |      |          |      |          |      |   |   |   |   |   |  |    |    |
|-------|-------|-------|-------|------|----------|------|----------|------|---|---|---|---|---|--|----|----|
| 54732 | TMED9 | 20.92 | 20.19 | 0.73 | 8.47E-26 | 0.92 | 1.15E-11 | 2.64 | 0 | 1 | 0 | 3 | 0 |  |    |    |
| 7145  | TNS1  | 20.40 | 20.05 | 0.34 | 1.33E-06 | 0.35 | 1.01E-03 | 3.43 | 4 | 2 | 0 | 6 | 0 |  |    |    |
| 57761 | TRIB3 | 18.14 | 15.20 | 2.94 | 1.52E-36 | 2.99 | 2.06E-12 | 7.49 | 1 | 1 | 0 | 4 | 0 |  |    |    |
| 7249  | TSC2  | 17.27 | 17.05 | 0.22 | 9.70E-11 | 0.05 | 3.90E-02 | 2.56 | 5 | 1 | 0 | 4 | 0 |  | 30 | 37 |
| 7311  | UBA52 | 20.96 | 20.41 | 0.55 | 1.90E-24 | 0.63 | 6.27E-11 | 2.32 | 0 | 0 | 1 | 0 | 3 |  |    |    |
| 7316  | UBC   | 22.48 | 21.53 | 0.95 | 5.97E-32 | 0.93 | 3.07E-12 | 1.93 | 3 | 0 | 1 | 0 | 3 |  |    |    |
| 7412  | VCAM1 | 21.11 | 19.08 | 2.03 | 1.48E-28 | 2.26 | 7.41E-12 | 4.72 | 1 | 1 | 4 | 3 | 9 |  |    |    |
| 7422  | VEGFA | 21.40 | 17.78 | 3.63 | 2.85E-39 | 3.30 | 1.37E-12 | 4.23 | 1 | 1 | 0 | 9 | 0 |  |    |    |
| 7431  | VIM   | 23.83 | 20.88 | 2.95 | 1.60E-39 | 2.85 | 1.15E-12 | 2.34 | 0 | 1 | 0 | 4 | 0 |  |    |    |

**Abbreviations:** FC, fold-change; CV, coefficient of variation; NA, not available

Fig. S1:

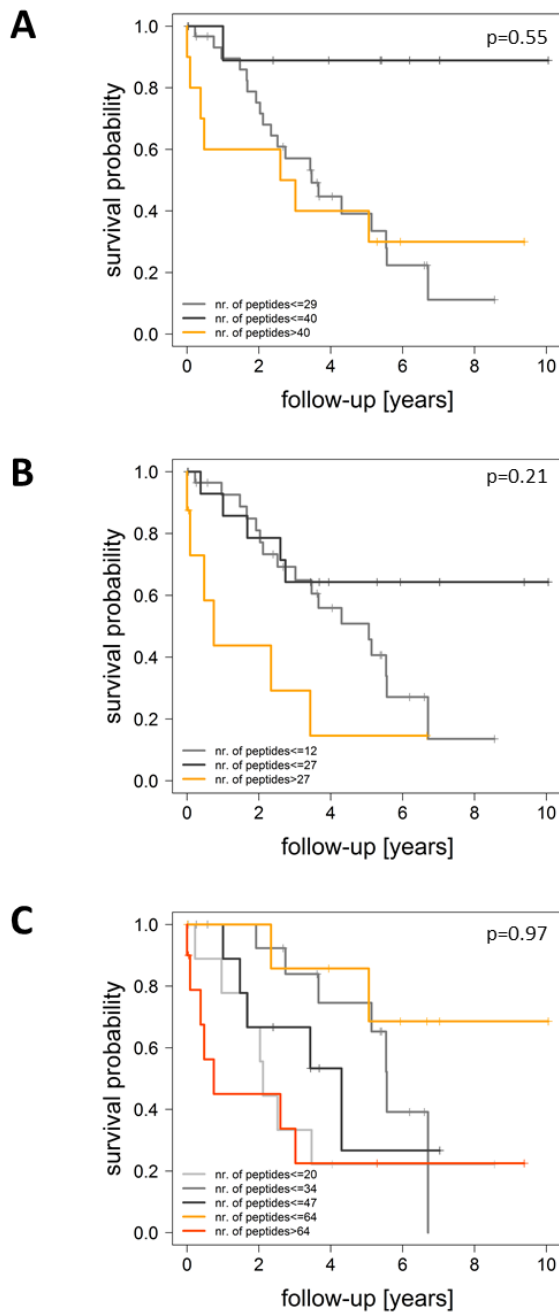

**Fig. S1: Peptide presentation and overall patient survival in patient cohort 1.**

Overall survival of patients and the presence of **A** frequent ccRCC-associated HLA class I presented peptides; **B** frequent ccRCC-associated HLA class II presented peptides; and **C** combined frequent ccRCC-associated HLA class I and class II presented peptides. The conditional interference tree model was used to determine the optimal cutoffs with respect to overall survival using the R packages survival [1] and party [2]. P-values were computed from absolute peptide numbers by Wald test.

Fig. S2:

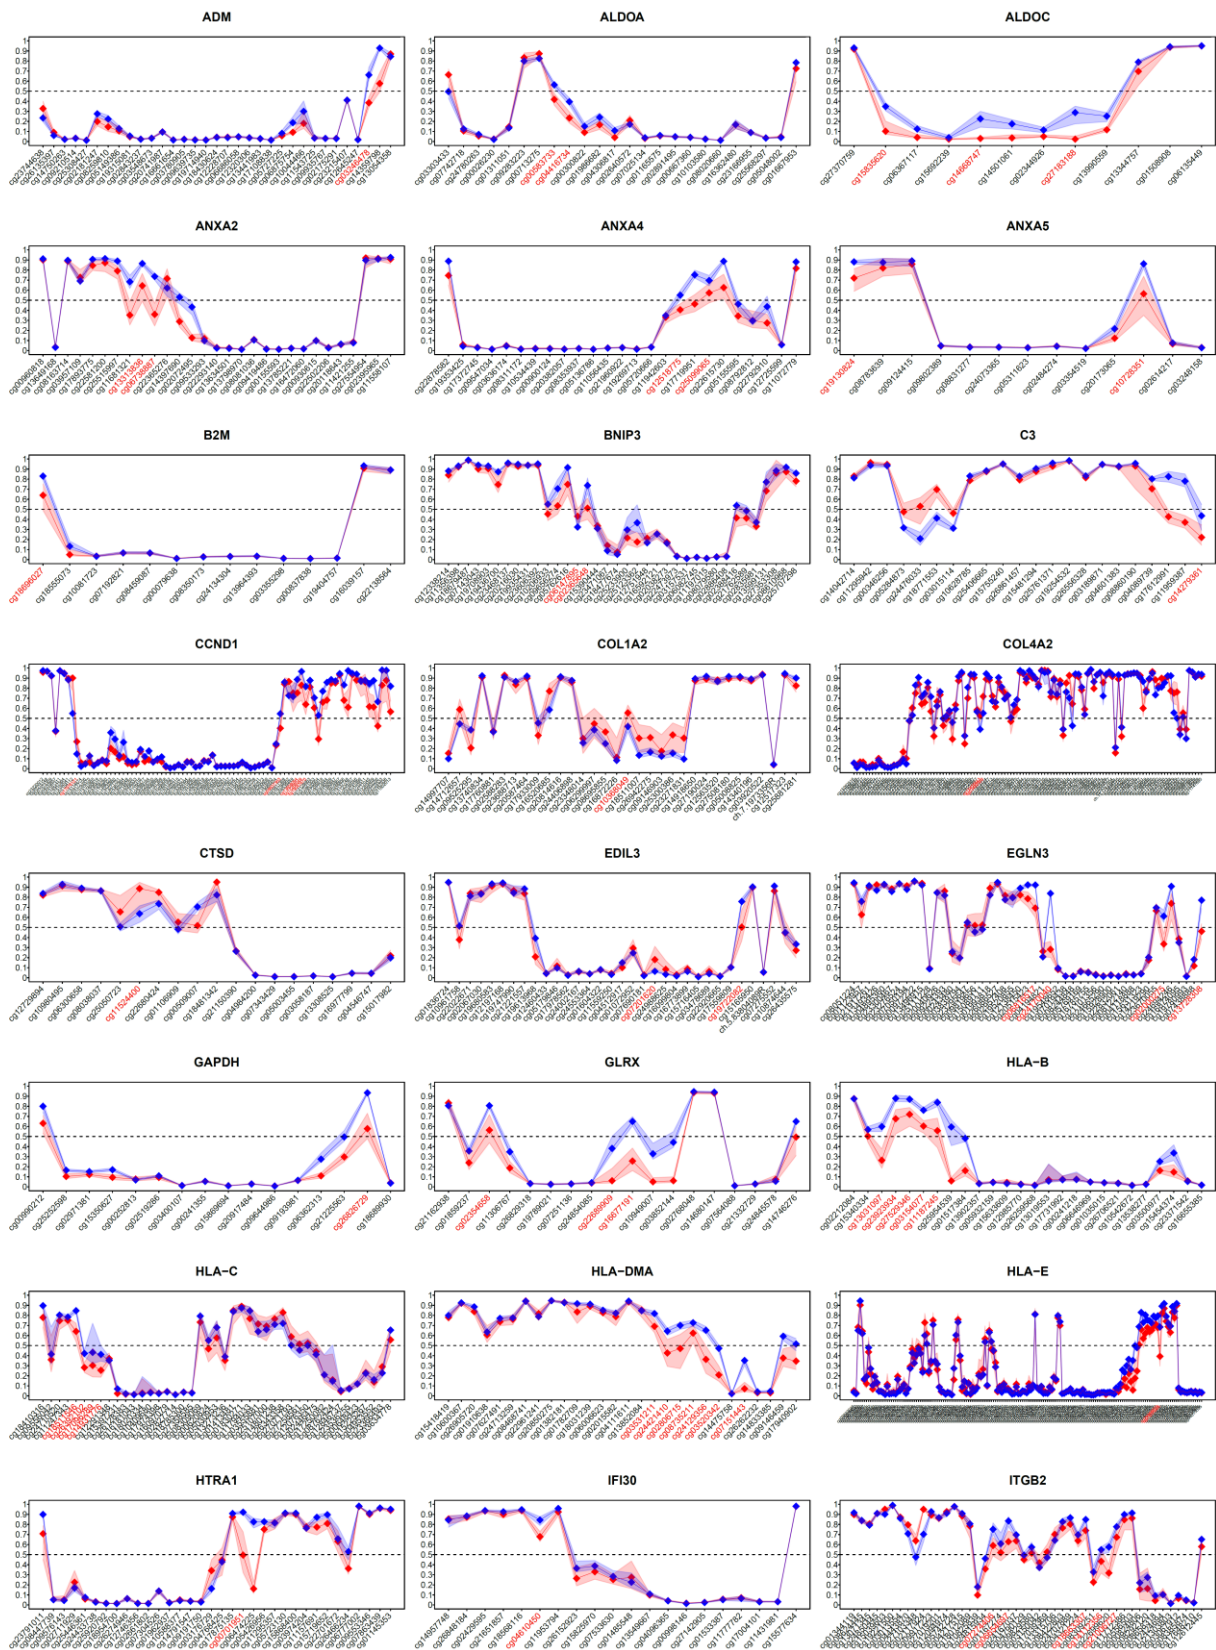

Fig. S2 (continued):

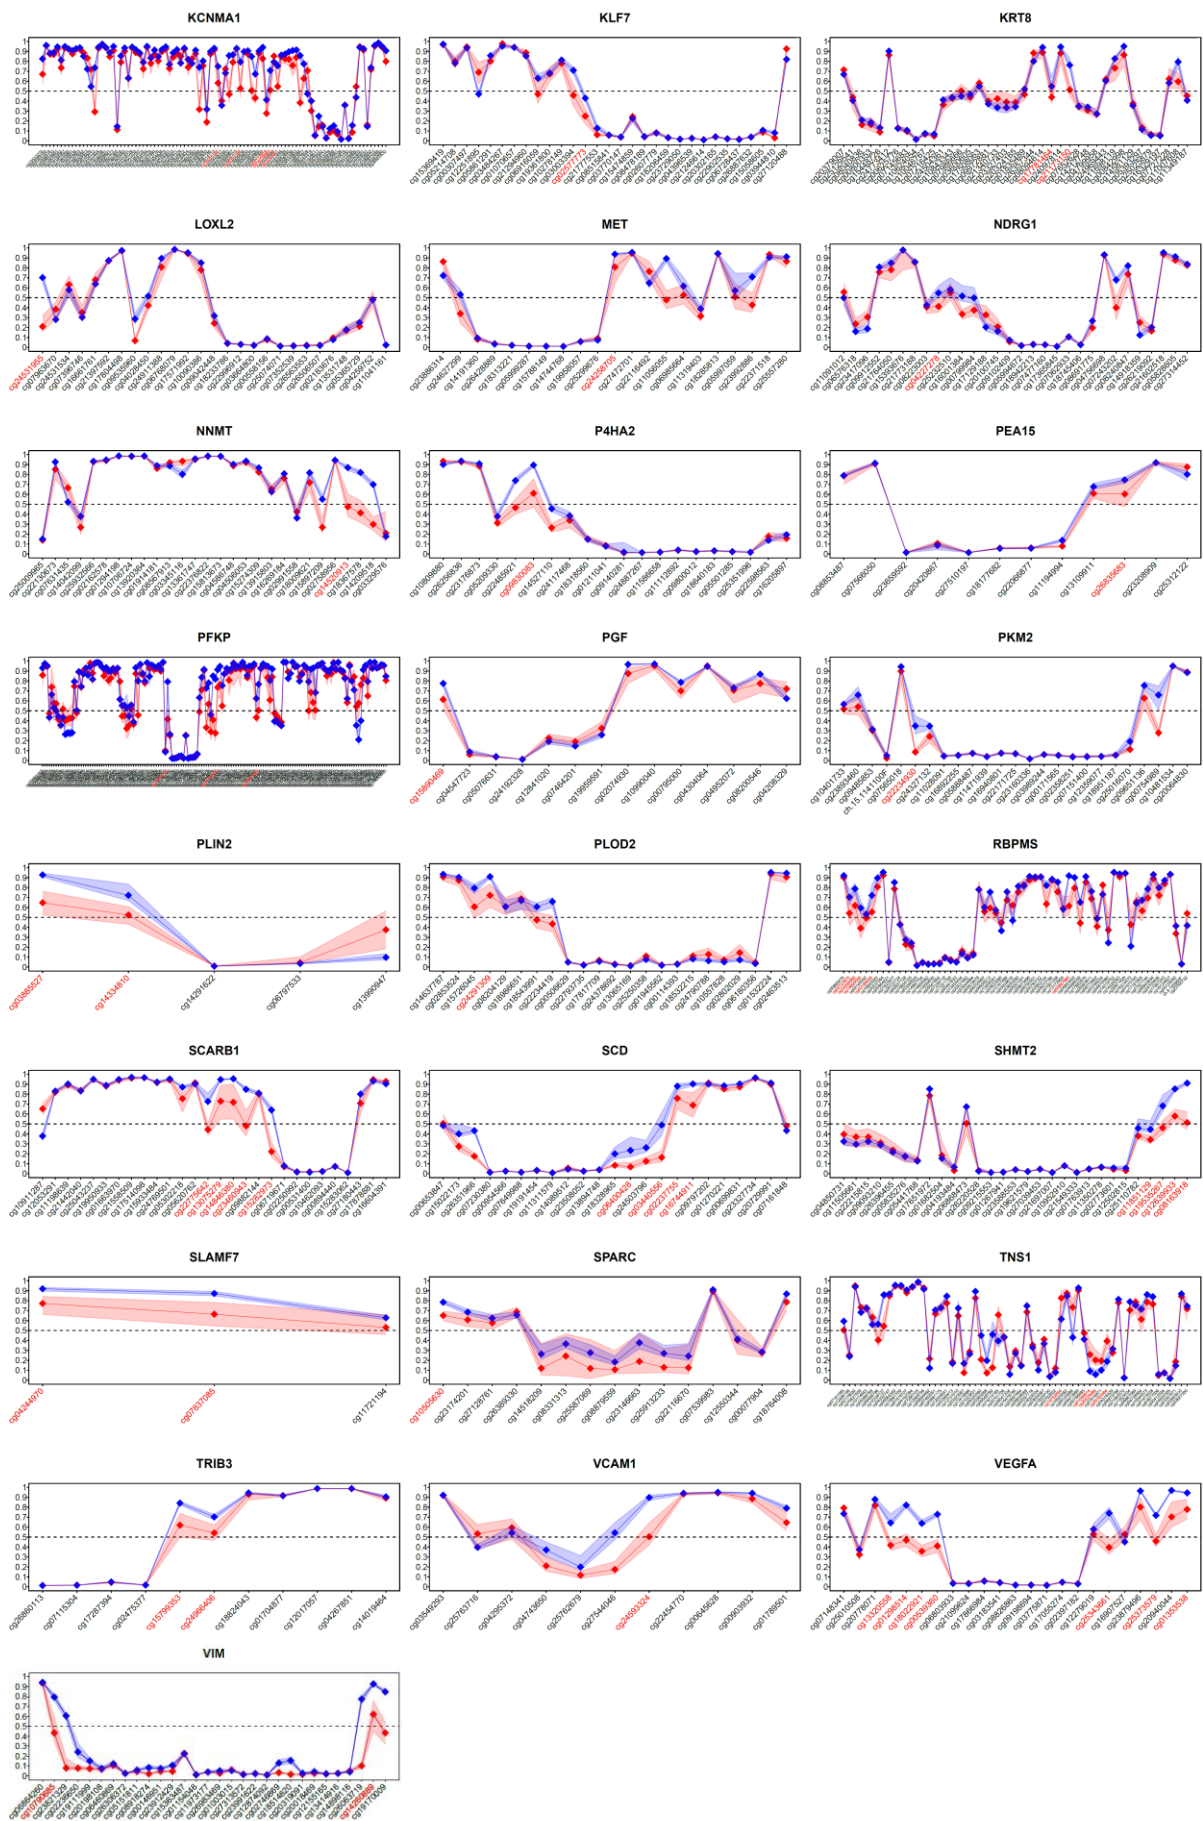

**Fig. S2: DNA methylation profiles of differentially methylated genes in the TCGA patient cohort.**

The plots show the median methylation levels (curves) in tumors (red) and non-tumor tissues (blue) together with the 25 % and 75 % quantile ranges (shaded areas). The sites are ordered according to their genomic position in 5'→3' direction. Differentially methylated sites that correlate significantly negative ( $R_s \leq -0.3$ ,  $p < 0.05$ ) with gene expression of the associated gene are printed in red.



**Fig. S3:**

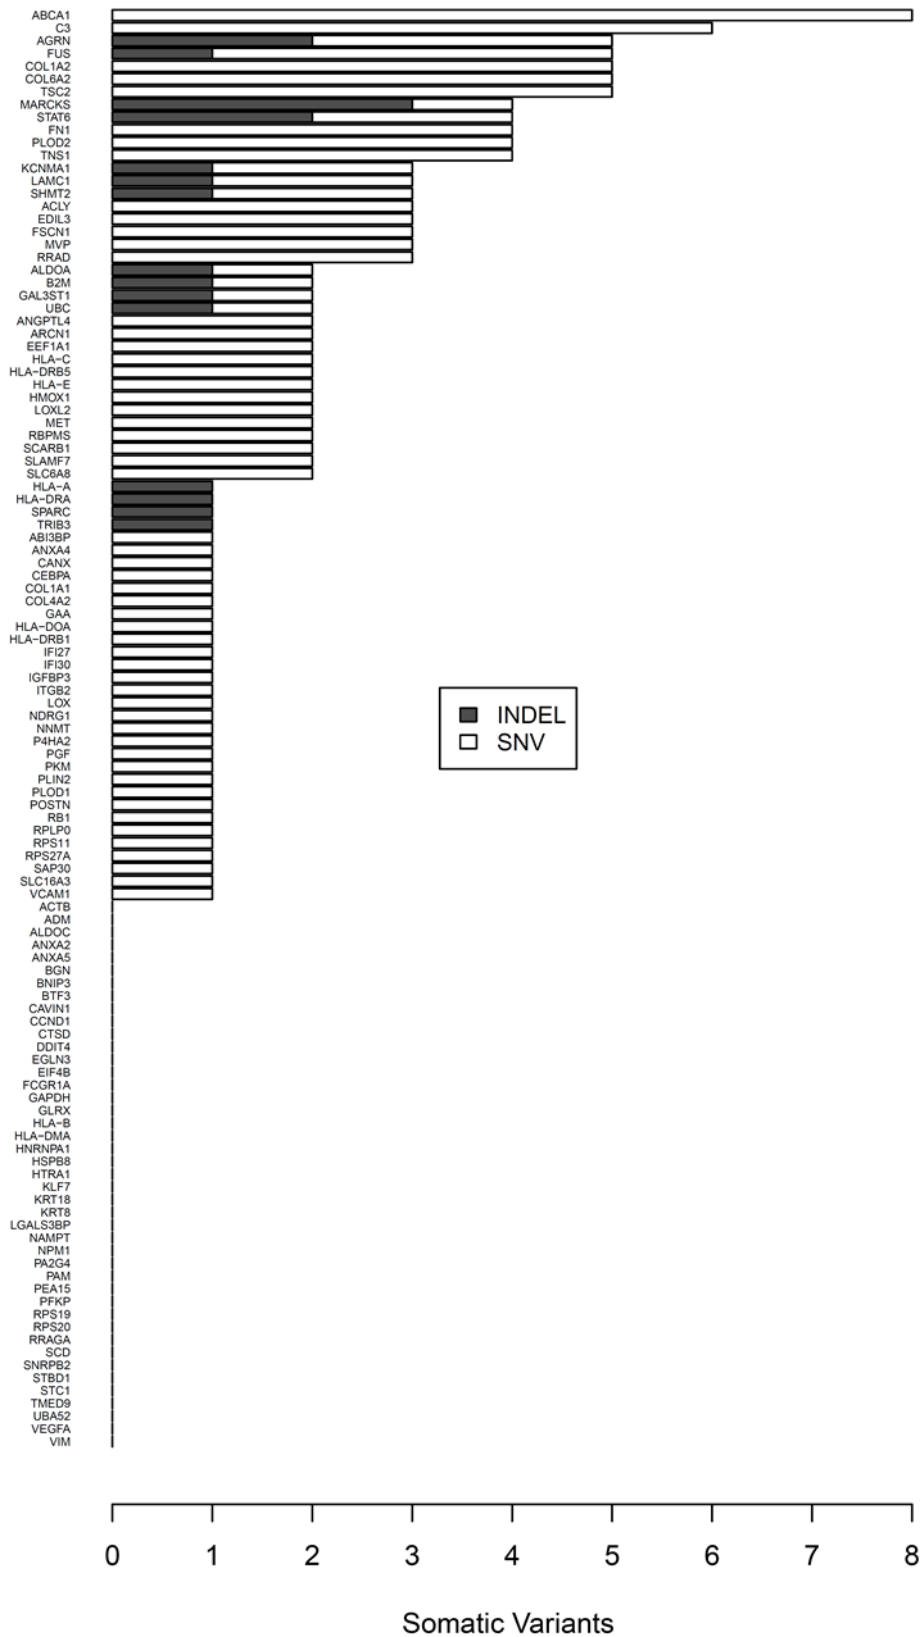

**Fig. S3: Somatic variants in candidate genes in 392 samples of the TCGA patient cohort.** The bars indicate the number of tumors with somatic point mutations or indels resulting in protein alterations of the corresponding genes.

**Fig. S4:**

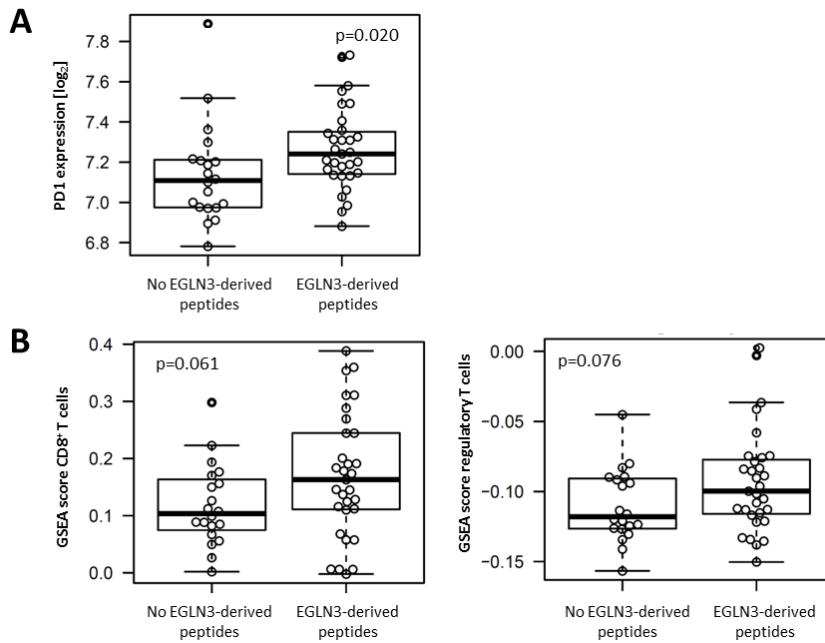

**Fig. S4: EGLN3-derived peptides and tumor immune infiltrate in patient cohort 1. A** PD1 expression in tumor tissues of patients without EGLN3-derived peptides and with at least one EGLN3-derived peptide. **B** GSEA scores for CD8+ T cell infiltrate (left) and regulatory T cell infiltrate (right) in patients without and with at least one EGLN3-derived peptide. Immune signatures were taken from Rooney *et al.* 2015 [3]. Other signatures that were assessed are: B cells, macrophages, neutrophils, NK cells, pDCs, MHC class I, co-stimulation APC, co-stimulation T cell, co-inhibition APC, co-inhibition T cell, type I interferon response, type II interferon response, and cytolytic activity [3]. None of those correlated significantly with the presence of EGLN3-derived peptides. Wilcoxon rank-sum test p-values are shown in the plots.

Fig. S5:

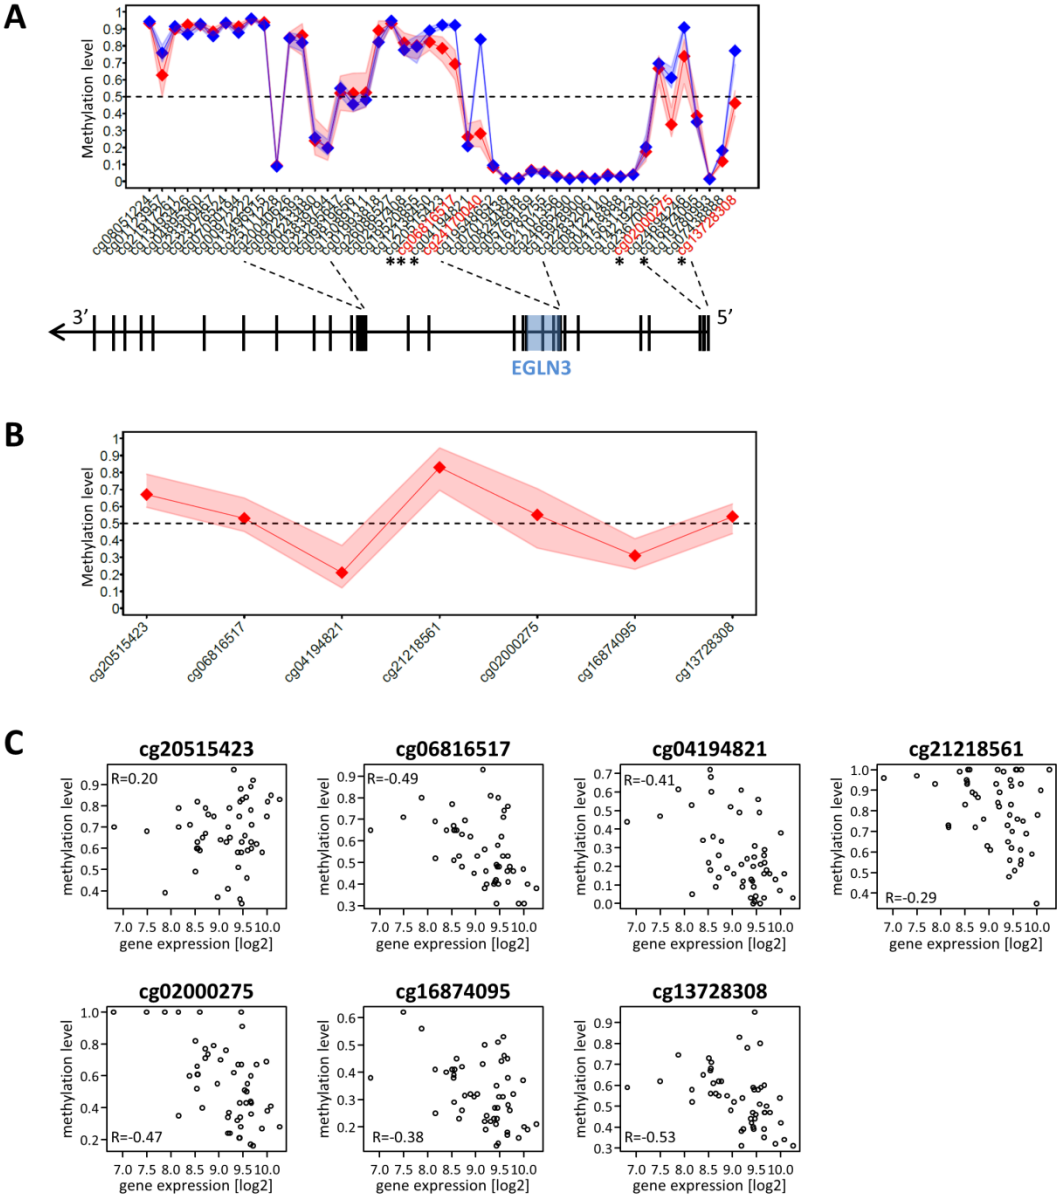

**Fig. S5: DNA methylation of the EGLN3 gene region.** **A** Methylation profile in tumor (red) and non-tumor tissue (blue) in the TCGA patient cohort (enlarged from Fig. S2). The scheme below depicts the *EGLN3* gene region. Sites that were chosen for further analysis in patient cohort 1 are marked by an asterisk. **B** Methylation profiles in patient cohort 1 analyzed by MALDI-TOF MS of bisulfite treated DNA as described previously [4]. The site cg21218561 was chosen for analysis in the cohort, in addition to the sites marked above. **C** Correlation plots of *EGLN3* gene expression and DNA methylation at the indicated CpG sites in patient cohort 1. Spearman correlation coefficients are printed in the graphs.

Fig. S6:

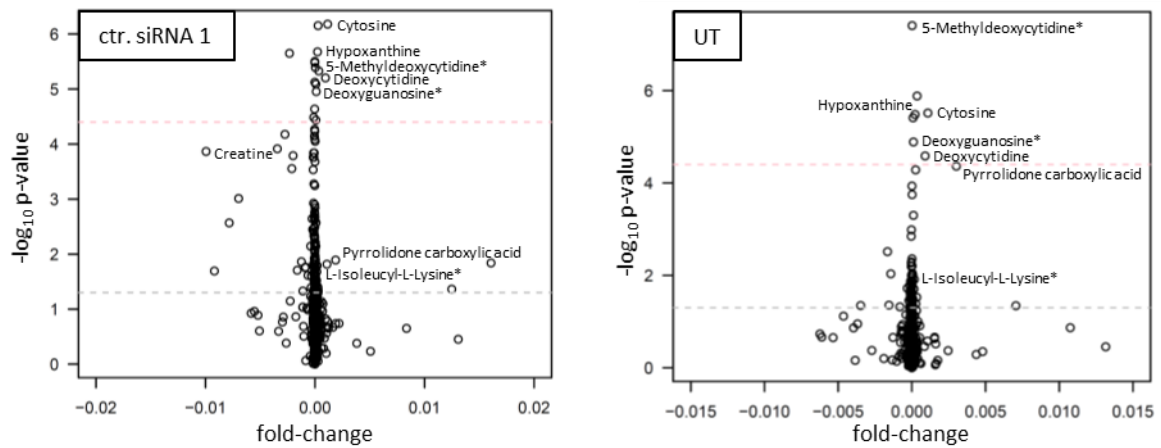

**Fig. S6: Differentially regulated metabolites in EGLN3 knockdown 786-O cells.** Features were measured in positive ionization modes and assigned to specific metabolites if possible, using the in-house metabolite library [5]. Metabolites marked by an asterisk are assigned by their molecular formula using the PubChem database [6]. The plot on the left shows fold-changes between *EGLN3* knockdown cells and cells transfected with a control non-targeting siRNA pool. The plot on the right shows fold-changes between *EGLN3* knockdown cells and untreated cells. The intersected lines indicate the significance thresholds of unadjusted (grey) and adjusted (pink) p-values.

**Fig. S7:**

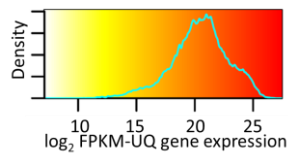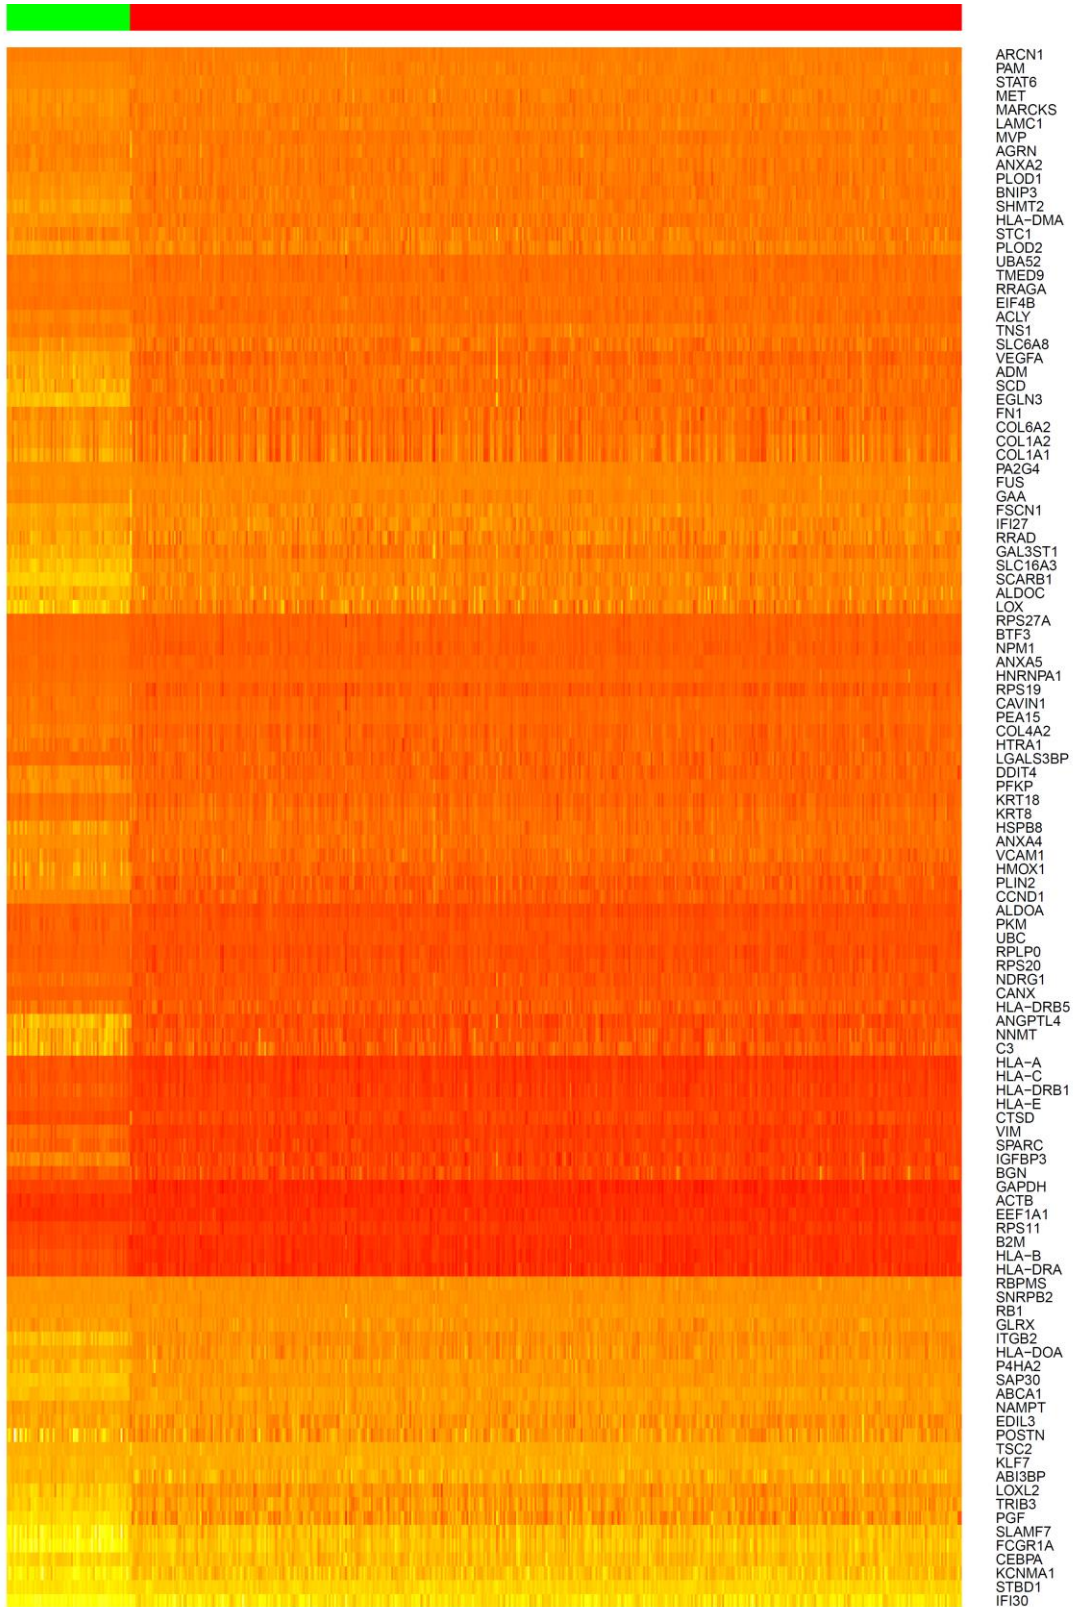

**Fig. S7: Heatmap of gene expression of the 113 candidates in non-tumor and ccRCC tissue of the TCGA patient cohort.** Yellow indicates low expression, red indicates high expression. Expression fold-changes between tumor and non-tumor tissue are summarized in Tab. S10. Non-tumor tissues are marked by the green bar above the heatmap, tumor tissues are marked by the red bar.

## References

1. Therneau TM, Lumley T. survival: Survival Analysis. R package version 2.44-1.1. 2019. <https://CRAN.R-project.org/package=survival>.
2. Hothorn T, Hornik K, Zeileis A. Unbiased Recursive Partitioning: A Conditional Inference Framework. *J Comput Graph Stat*. 2006;15:651–74. doi:10.1198/106186006X133933.
3. Rooney MS, Shukla SA, Wu CJ, Getz G, Hacohen N. Molecular and genetic properties of tumors associated with local immune cytolytic activity. *Cell*. 2015;160:48–61. doi:10.1016/j.cell.2014.12.033.
4. Fisel P, Kruck S, Winter S, Bedke J, Hennenlotter J, Nies AT, et al. DNA methylation of the SLC16A3 promoter regulates expression of the human lactate transporter MCT4 in renal cancer with consequences for clinical outcome. *Clin Cancer Res*. 2013;19:5170–81. doi:10.1158/1078-0432.CCR-13-1180.
5. Leuthold P, Schaeffeler E, Winter S, Buttner F, Hofmann U, Murdter TE, et al. Comprehensive Metabolomic and Lipidomic Profiling of Human Kidney Tissue: A Platform Comparison. *J Proteome Res*. 2017;16:933–44. doi:10.1021/acs.jproteome.6b00875.
6. PubChem. National Center for Biotechnology Information (NCBI), Bethesda, USA. 2017. <https://pubchem.ncbi.nlm.nih.gov/>. Accessed 29 Aug 2017.
